1 **Differential morphological changes in response to environmental stimuli in a**  
2 **fungal plant pathogen**

3

4 Carolina Sardinha Francisco<sup>a</sup>, Xin Ma<sup>a</sup>, Maria Manuela Zwysig<sup>a</sup>, Bruce A. McDonald<sup>a</sup>,  
5 Javier Palma-Guerrero<sup>a</sup>

6

7 <sup>a</sup>Plant Pathology Group, Institute of Integrative Biology, ETH Zürich, 8092 Zürich,  
8 Switzerland

9

10 Running Title: Pleomorphism in *Zymoseptoria tritici*

11

12 #Address correspondence to Javier Palma-Guerrero, [javier.palma@usys.ethz.ch](mailto:javier.palma@usys.ethz.ch)

13

14 **ABSTRACT**

15 During their life cycles, pathogens have to adapt to many biotic and abiotic  
16 environmental constraints to maximize their overall fitness. Morphological transitions are  
17 one of the least understood of the many strategies employed by fungal plant pathogens  
18 to adapt to constantly changing environments. We characterized the responses of the  
19 wheat pathogen *Zymoseptoria tritici* to a series of environmental stimuli using  
20 microscopy, transcriptomic analyses, and survival assays to explore the effects of  
21 changing environments on morphology and adaptation. We found that all tested stimuli  
22 induced morphological changes, with distinct responses observed among four different  
23 strains. The transcription analyses indicated a co-regulation of morphogenesis and  
24 virulence factors in *Z. tritici*. We discovered that *Z. tritici* forms chlamydospores and we  
25 demonstrate that these survival structures are better able to withstand extreme cold,  
26 heat and drought than other cell types. We also demonstrate that blastospores (the  
27 “yeast-like” form typically found only *in vitro*) can form from germinated pycnidiospores  
28 on the wheat leaf surface, suggesting that this morphotype can play an important role in  
29 the natural history of *Z. tritici*. Our experiments illustrate how changing environmental  
30 conditions can affect cellular morphology and lead to the formation of new morphotypes  
31 that can have a significant impact on both pathogen survival and disease epidemiology.

32

33 **KEYWORDS**

34 pleomorphism, environmental stimuli, cell morphology, plant pathogen, chlamydospore,  
35 virulence

36

## 37 **INTRODUCTION**

38 Fungi occupy a wide range of niches that can impose different environmental constraints  
39 on their growth, reproduction and survival. In response, fungi evolved the ability to  
40 detect and respond to different environmental stimuli in order to maximize their fitness  
41 (Brown, Cowen, di Pietro, & Quinn, 2017). One of the strategies that fungi employ to  
42 cope with diverse biotic and abiotic stimuli is to change their morphology (Lin, Alspaugh,  
43 Liu, & Harris, 2014; Mayer, Wilson, & Hube, 2013; Wang & Lin, 2012). For fungal  
44 pathogens, different morphotypes can play different roles during the host-pathogen  
45 interaction to improve the overall fitness. For example, hyphae may be the most  
46 appropriate morphology to cross physical barriers, colonize host tissue (Kumamoto &  
47 Vinces, 2005; Lin et al., 2014), and escape harmful environments generated by host  
48 defences (Brand, 2012; Kumamoto & Vinces, 2005). On the other hand, yeast cells (or  
49 “yeast-like cells”) may be a better morphology to enable dispersal among host niches or  
50 between hosts and to increase the overall population size (Lin et al., 2014; Thompson,  
51 Carlisle, & Kadosh, 2011). The majority of fungal morphotype transitions occur between  
52 hyphal and yeast growth forms. Fungi with this ability are called dimorphic. Usually, they  
53 grow as saprophytic molds that live on dead organic matter and are facultative human  
54 pathogens, albeit dimorphism is also exploited by plant pathogens (Lin et al., 2014;  
55 Lübbehüsen, Nielsen, & McIntyre, 2003; Nadal, Garcia-Pedrajas, & Gold, 2008).

56

57 Some fungi can produce additional morphologies, including pseudohyphae and  
58 chlamydospores. Fungi that can produce more than two morphotypes are called

59 pleomorphic. Pseudohyphae are distinguished from true hyphae by constrictions that  
60 form at the septal junctions, leading to a loss in cytoplasmic continuity between mother  
61 and daughter cells (Veses & Gow, 2009). Though little is known about the ecological  
62 significance of pseudohyphae and their role during host infection, it was suggested that  
63 this morphotype facilitates foraging for scarce nutrients and increases motility in the host  
64 (Gancedo, 2001; Thompson et al., 2011). Chlamydospores are spherical, thick-walled  
65 cells formed on the tips of pseudohyphae or on distal parts of differentiated hyphae  
66 called suspensor cells (Noble, Gianetti, & Witchley, 2017). In contrast to pseudohyphae,  
67 chlamydospores are well-characterized and known to operate as long-term survival  
68 structures that can resist many environmental stresses (Couteaudier & Alabouvette,  
69 1990; Lin & Heitman, 2005; McNeel, Kulkarni, & Nickerson, 1983; Noble et al., 2017;  
70 Son, Lee, & Lee, 2012). Pleomorphism has been observed in fungal pathogens of  
71 humans (Lin & Heitman, 2005; Miyaji, Sano, & Sharmin, 2003; Noble et al., 2017) and  
72 plants (Hoes, 1971; McNeel et al., 1983; Schade, Walther, & Wendland, 2003).

73  
74 Genes controlling morphogenesis can be co-regulated with genes encoding virulence  
75 (Klein & Tebbets, 2007; Kumamoto & Vinces, 2005; Lin et al., 2014; Mayer et al., 2013;  
76 Nigg, Laroche, Landry, & Bernier, 2015; Thompson et al., 2011; Wang & Lin, 2012). The  
77 induction of virulence genes is usually associated with a specific morphotype. For  
78 example, certain virulence genes are expressed only during the yeast-phase of growth  
79 in *Histoplasma capsulatum*, while other virulence genes are expressed only during  
80 hyphal growth in *Candida albicans* (Brand, 2012; Edwards et al., 2013; Kumamoto &  
81 Vinces, 2005).

82  
83 *Zymoseptoria tritici* is the most damaging pathogen of wheat in Europe (Fones & Gurr,  
84 2015; Torriani et al., 2015) and an important pathogen of wheat worldwide. *Z. tritici* is  
85 considered a dimorphic fungus that grows either as blastospores (the “yeast-like” form)  
86 or as filamentous hyphae depending on the culture conditions. Though the role of  
87 blastospores in nature was unclear until now, hyphae are essential for penetrating wheat  
88 leaves through stomata (Kema, Yu, Frits, Shaw, & Baayen, 1996; Steinberg, 2015). The  
89 stimuli that induce morphological changes and the cell signaling pathways involved in  
90 morphological transitions remain largely unknown in this pathogen. Nutrient-rich media  
91 and temperatures ranging from 15°C to 18°C tend to induce blastosporulation  
92 (blastospore replication by budding) while nutrient-limited media and high temperatures  
93 (from 25°C to 28°C) tend to promote the blastospore-to-hyphae transition in the *Z. tritici*  
94 reference strain IPO323 (King et al., 2017; Motteram et al., 2011). Some genes affecting  
95 morphogenesis in *Z. tritici* were identified and functionally characterized. Most of these  
96 belonged to the mitogen-activated protein kinase (MAPK) or cAMP-dependent signaling  
97 pathways involved in extracellular signal transduction, regulating many cellular  
98 processes, development and virulence (Choi & Goodwin, 2011; Cousin et al., 2006; King  
99 et al., 2017; Mehrabi et al., 2009; Mehrabi & Kema, 2006; Mehrabi, van der Lee,  
100 Waalwijk, & Kema, 2006; Mehrabi, Zwiers, de Waard, & Kema, 2006; Mirzadi Gohari et  
101 al., 2014; Mohammadi et al., 2017; Motteram et al., 2011; Yemelin et al., 2017).  
102 However, the transcriptome signatures associated with specific morphologies were not  
103 reported until now.

104

105 In this study we aimed to characterize the morphological responses of *Z. tritici* to  
106 different environmental factors. We found that the fungus changed its morphology in  
107 response to all tested stimuli, although distinct responses were observed for four  
108 different strains sampled from the same geographical population. Transcriptional  
109 analyses showed a co-regulation of mycelial growth with expression of virulence factors.  
110 We discovered that *Z. tritici* forms chlamydospores both *in vitro* and *in planta*. We also  
111 found that pseudohyphae will form in some environments. We showed that blastospores  
112 can form by budding from pycnidiospores inoculated onto the surface of wheat leaves,  
113 demonstrating that this cell type can be produced under natural conditions. Based on  
114 these findings, we re-define *Z. tritici* as a pleomorphic fungus that produces four different  
115 morphotypes according to the associated environment.

116

## 117 **Material and Methods**

118 **Fungal strains, environmental stimuli, and growth conditions.** Four previously  
119 characterized *Zymoseptoria tritici* strains (ST99CH\_1A5, ST99CH\_1E4, ST99CH\_3D1,  
120 and ST99CH\_3D7, abbreviated as 1A5, 1E4, 3D1, and 3D7, respectively; (Croll, Zala, &  
121 McDonald, 2013; Zhan et al., 2005), were used in this study. 3D7 and 1A5 strains  
122 expressing cytoplasmic GFP (Kilaru, Schuster, Ma, & Steinberg, 2017) were provided by  
123 Dr. A. Sanchez-Vallet (Zala et al., 2018). All strains were grown in yeast sucrose broth  
124 (YSB; yeast extract 10 g/L and sucrose 10 g/L; pH 6.8). Depending on the tested  
125 environment, we used either YSB or a defined salts medium (Minimal Medium – MM, pH  
126 5.8; (Vogel, 1956). Each strain was stored in glycerol at -80°C until required and then  
127 recovered in YSB medium incubated at 18°C for three days. For nutrient limitation

128 experiments, the cells were washed three times with sterile distilled water to remove any  
129 remaining nutrients prior to placing them into nutrient-limited conditions. Cell  
130 concentrations were determined by counting blastospores using a KOVA cell chamber  
131 system (KOVA International Inc., USA).

132  
133 **Effect of temperature on growth morphology.** Blastospores of each strain were  
134 inoculated on YSB at a final concentration of  $10^5$  blastospores/mL. Three flasks were  
135 incubated at 18°C (as control) and three at 27°C for four days. An aliquot was taken  
136 from each flask at 8, 24, 48, 96, and 144 hours after incubation (hai) to monitor cell  
137 morphology by light microscopy using a Leica DM2500 microscope with LAS version  
138 4.6.0 software. These experiments were repeated three times.

139  
140 **Effect of nutrient limitation on growth morphology.** MM was used to monitor the  
141 transition in growth morphologies under different nutrient limitations. The effect of  
142 carbon depletion was assessed by adding each strain at a final concentration of  $10^5$   
143 blastospores/mL into either regular MM, which contains sucrose as the main carbon  
144 source, or into MM without sucrose (C-depleted medium) and incubated at 18°C. The  
145 cell morphology was observed by light microscopy every 24 hours until 144 hai. The  
146 effect of nitrogen depletion was determined using MM lacking ammonium nitrate  
147 ( $\text{NH}_4\text{NO}_3$ ), which is normally present in MM as the main nitrogen source. We compared  
148 the growth morphologies of cells growing in MM with and without ammonium nitrate by  
149 light microscopy during 96 hours of incubation at 18°C. The growth morphologies in both

150 nutrient-limited conditions were compared to the morphologies found in the nutrient-rich  
151 YSB. Experiments were repeated three times for each nutrient environment.

152

153 **Effect of oxidative stress on growth morphology.** Hydrogen peroxide (H<sub>2</sub>O<sub>2</sub>) was  
154 added into YSB at different concentrations (0, 0.5, 1, 2, 5, and 10 mM) to induce  
155 different levels of exogenous oxidative stress. Each strain was added to a final  
156 concentration of 10<sup>5</sup> blastospores/mL and incubated at 18°C. Morphological changes  
157 and cellular morphologies were observed by light microscopy at 72 hai. To determine  
158 whether a lower concentration of blastospores promotes a higher susceptibility to  
159 oxidative stress, we performed the same experiment using a final concentration of 10<sup>3</sup>  
160 blastospores/mL. These experiments were repeated twice.

161

162 **Effect of pH on growth morphology.** C-depleted medium (pH ~5.8) was used as a  
163 control. We also used a non-buffered C-depleted medium adjusted to be acidic (pH 4) or  
164 alkaline (pH 8) with 1 M HCl and 1 M NaOH, respectively. Three flasks containing C-  
165 depleted medium at the indicated pHs were inoculated at a final concentration of 10<sup>5</sup>  
166 blastospores/mL and maintained at 18°C. The pH was measured using a standard pH  
167 meter. Morphological changes were monitored by light microscopy at 8, 24, 72 and 168  
168 hai. These experiments were repeated three times.

169

170 **Effect of inoculum size on growth morphology.** Flasks containing YSB or C-depleted  
171 medium were inoculated with a final cell density of 10<sup>7</sup> blastospores/mL, followed by a  
172 10X serial dilution to a concentration of 10<sup>3</sup> blastospores/mL. Flasks containing C-



173 depleted medium were incubated at 18°C and flasks with YSB were incubated at 27°C.  
174 Cell morphology was determined every 24 hours using light microscopy over 144 hours of  
175 incubation. These experiments were repeated three times.

176

177 **RNA extraction, library preparation, and sequencing.** Flasks containing a final  
178 concentration of  $10^5$  blastospores/mL in YSB or C-depleted medium were incubated at  
179 18°C to induce blastosporulation or mycelial growth, respectively. Total RNA was  
180 extracted by using TRIzol (Thermo Fisher Scientific, Waltham, Massachusetts) following  
181 the manufacturer's instructions. RNA quality was checked using a Qubit fluorometer  
182 (Thermo Fisher Scientific, Waltham, Massachusetts) and a TapeStation 2200 (Agilent,  
183 Santa Clara, California). Truseq stranded mRNA kit (Illumina Inc., San Diego, CA, USA)  
184 was used for library preparation, and ribosomal RNA was depleted by polyA enrichment.  
185 The quality and quantity of the enriched libraries were assessed using a Qubit  
186 fluorometer (Thermo Fisher Scientific) and TapeStation (Agilent). Libraries were  
187 sequenced on the Illumina HiSeq 2500 at 4 x 100 bp paired end reads.

188

189 **Transcriptome mapping and quantification.** The sequencing adapters and reads  
190 shorter than 15 bp were trimmed from raw Illumina reads using Trimmomatic v.0.36  
191 (Bolger, Lohse, & Usadel, 2014) with the following settings: ILLUMINACLIP:TrueSeq3-  
192 PE:fa:2:30:10, LEADING:2 TRAILING:2, SLIDINGWINDOW:4:15 MINLEN:15. Filtered  
193 reads of each *Z. tritici* strain for the most common growth morphologies (blastospores  
194 and mycelial growth) were mapped against their respective genomes using Tophat  
195 v.2.0.13 (Trapnell, Pachter, & Salzberg, 2009). HTSeq-count v.0.6.1 was used to

196 calculate the gene counts (Anders, Pyl, & Huber, 2015). Mapped reads with more than  
197 one reported alignment were excluded from further analyses. We applied the TMM  
198 (trimmed mean of M values) method implemented in the Bioconductor edgeR v.3.12.0  
199 package to normalize the gene counts and to calculate the differentially expressed  
200 genes under each condition (Robinson, McCarthy, & Smyth, 2010; Robinson & Oshlack,  
201 2010). Only genes with average counts per million reads per sample >1 for at least one  
202 growth condition were counted as expressed genes. The Benjamin-Hochberg false  
203 discovery rate (FDR) correction was used to adjust p-values based on the Fisher exact  
204 test.

205  
206 **Transcription profile analysis.** We generated the CPM (counts per million mapped  
207 reads) values based on TMM-normalized library sizes obtained from the edgeR v.3.12.0  
208 package (Robinson & Oshlack, 2010). Only genes with adjusted p-values of  $FDR \leq 0.01$   
209 were included in the analysis. The published transcriptomes of each strain during wheat  
210 infection at 7 days post infection (dpi) (Palma-Guerrero et al., 2017) were used for  
211 comparative analyses (datasets in NCBI SRA SRP077418). Only genes that were  
212 significantly upregulated during both wheat infection at 7 dpi and in C-depleted medium  
213 compared to YSB were considered to be mycelial growth-related genes. These genes  
214 were used in further analyses. Specific transcriptome signatures were identified using  
215 Venn diagrams based on the differentially expressed genes present in the *Z. tritici*  
216 reference genome annotations (Grandaubert, Bhattacharyya, & Stukenbrock, 2015;  
217 Plissonneau, Hartmann, & Croll, 2018) that were shared among all four strains under

218 each growth condition. We also used the published transcriptomes of different stages of  
219 wheat infection (Palma-Guerrero et al., 2017) to interpret the expression profiles of  
220 some genes under both axenic and *in planta* conditions. The log<sub>2</sub>-transformed CPM  
221 values of those genes were plotted using the R package ggplot2 (Wickham, 2009).

222

### 223 **Fluorescence microscopy to quantify chitin and lipids in different morphotypes.**

224 Blastospores of 1A5 were inoculated into YSB to a final concentration of 10<sup>5</sup>  
225 blastospores/mL and incubated at 18°C or 27°C to induce blastosporulation or  
226 chlamydospore-like formation, respectively. 1A5 was also inoculated at the same  
227 concentration into C-depleted medium and incubated at 18°C to induce hyphal growth.  
228 After four days of incubation, the resulting cells were harvested and fixed with 70% (v/v)  
229 ethanol for 30 minutes, followed by three washes with phosphate buffer saline (PBS).  
230 The cells were stained with 1 µg/mL of Calcofluor White (CFW – a chitin-binding dye)  
231 and 2.5 µg/mL of Nile Red (NR – a lipophilic dye) (both reagents from Sigma-Aldrich  
232 Chemie GmbH, Munich, Germany) for 15 minutes. The stained cells were viewed with a  
233 Leica DM2500 microscope with LAS version 4.6.0 software, using a UV filter system for  
234 CFW consisting of an excitation filter at 340-380 nm and a long pass emission filter  
235 (>425 nm), and a red filter system for NR consisting of an excitation filter at 546-566 nm  
236 and an emission filter at 585-625 nm.

237

238 **Transmission electron microscopy (TEM).** Cells of 1A5 and 3D7 were collected after

239 4 days of growth in YSB at 18°C or 27°C. Pycnidiospores for each strain were harvested

240 from infected wheat plants. Samples were prepared using microwave-assisted fixation in  
241 0.1 M cacodylate buffer (2.5% glutaraldehyde and 2% paraformaldehyde), using a  
242 PELCO Biowave (Ted Pella, California, USA), followed by embedding in 2% low melting  
243 temperature agarose (SeaPlaque Agarose, FMC Corporation, USA). A second step of  
244 microwave-assisted fixation was used after embedding in agarose. Before resin  
245 infiltration, the samples went through two steps of post-fixation, first in osmium tetroxide  
246 (OsO<sub>4</sub>) in 0.1 M cacodylate buffer and then in 1% uranyl acetate (UrAc), followed by a  
247 graded series of ethanol washes for dehydration (25%, 50%, 75%, 90%, and 100%).  
248 Samples were infiltrated with Spurr resin and polymerized at 60°C for 48 hours. Ultrathin  
249 sections (60 nm) were cut using the Leica Ultracut FC6 (Leica Microsystem, Vienna) and  
250 then transferred to formvar coated carbon grids, followed by post-staining with uranyl  
251 acetate and lead citrate. Micrographs were collected using a Morgagni 268 transmission  
252 electron microscope operating at 100 kV and using a CCD (1376x1032 pixel) camera.

253  
254 **Germination of chlamyospore-like cells and their survival under stress.**

255 Chlamyospore-like cells and blastospores of the 1A5 strain were harvested from YSB  
256 after 4 days of growth at 27°C or 18°C, respectively, and their concentrations were  
257 adjusted to  $\sim 10^5$  cells/mL. 10  $\mu$ L was spotted onto water agar (WA; 1% agar in water)  
258 and the plates were incubated at 18°C. Germ tube formation was checked at 0, 12, and  
259 24 hours after inoculation by light microscopy.

260

261 To determine whether chlamyospore-like cells differ in their ability to survive  
262 environmental stresses compared to blastospores and pseudohyphae, we exposed  
263  $8 \times 10^3$  cells/mL of each morphotype to different stresses, including drought and extreme  
264 temperatures.

265  
266 For drought stress, 200  $\mu$ L of each cell solution were spread onto Amersham Hybond™  
267 N<sup>+</sup> nylon membranes (GE Healthcare Life Sciences, Chicago, Illinois) and dried in a  
268 sterile Petri dish placed on a sterile bench in a laminar flow hood. The Petri dishes were  
269 then placed into a sealed box containing anhydrous silica gel for 1, 3, 5, or 10 days.  
270 After the drought stress, the membranes were placed onto YMA plates (4g/L yeast  
271 extract, 4g/L malt extract, 4g/L sucrose, and 12g/L agar), incubated at 18°C and colony  
272 formation was monitored. Control membranes containing each morphotype were  
273 transferred directly to YMA plates without any drying treatments.

274  
275 For cold stress, 300  $\mu$ L aliquots of each cell solution were submerged into liquid nitrogen  
276 for 1, 2, or 3 minutes, and 200  $\mu$ L of the thawed cell solution were spread onto YMA  
277 plates. Control samples were incubated at room temperature. For heat stress, 200  $\mu$ L  
278 aliquots of each morphotype were incubated for 24 hours at 30, 35, or 40°C, followed by  
279 plating on YMA. Controls were kept at 18°C. YMA plates from control and treated  
280 samples were incubated at 18°C for seven days. Survival rates for each cell type were  
281 estimated based on the number of colonies formed after exposure to the stressful  
282 conditions compared to the number of colonies formed by the controls.

283  
284 **Plant infection assays.** The susceptible wheat cultivar Drifter was used in all  
285 experiments. Plant growth conditions were described earlier (Meile et al., 2018). All  
286 infection assays used 16-day-old plants. For all four strains, blastospore suspensions  
287 produced after 3 days of growth in YSB at 18°C were filtered through two layers of  
288 cheesecloth and diluted to a final concentration of  $10^6$  blastospore/mL in 30 mL of sterile  
289 water supplemented with 0.1% (v/v) Tween 20. Spore suspensions were applied to run-  
290 off using a sprayer and the plants were kept for three days in sealed plastic bags,  
291 followed by 21 days in a greenhouse. Leaves with pycnidia were harvested and  
292 transferred to a 50 ml Falcon tube containing sterile water and gently agitated to harvest  
293 the pycnidiospores. Pycnidiospore suspensions were adjusted to a final concentration of  
294  $10^6$  pycnidiospores/mL and a new batch of plants were inoculated as described above.  
295 The plants infected by pycnidiospores were used to observe the formation of  
296 chlamyospore-like cells on wheat plants.

297  
298 To determine whether chlamyospore-like cells produce germ tubes and initiate hyhal  
299 growth after coming into contact with the host, we inoculated Drifter with  
300 chlamyospore-like cells from the 1A5 strain tagged with cytoplasmic GFP. Production  
301 of chlamyospore-like cells was induced using high temperature (YSB at 27°C) as  
302 described above. The suspension of chlamyospore-like cells was prepared and  
303 concentrations were standardized as described for blastospore infections. The  
304 inoculation procedure was the same except the inoculated plants were kept in plastic  
305 bags for only 24 hours.

306

307 To observe blastospore formation on the surface of wheat leaves, we inoculated plants  
308 using blastospores of the 3D7 strain tagged with cytoplasmic GFP. At 21 dpi, GFP-  
309 tagged 3D7 pycnidiospores were harvested and a new batch of plants was inoculated  
310 using these pycnidiospores as described earlier. The inoculated plants were kept in  
311 plastic bags at 100% humidity until they were examined for blastospores at 24 and 48  
312 hai.

313

314 To observe formation of chlamydospore-like cells *in planta*, infected leaves from wheat  
315 plants inoculated with pycnidiospores were harvested at 20 dpi. The infected leaves  
316 were incubated in a humidity chamber for 24 hours, following by washes with sterile  
317 distilled water to collect the released spores. The spore suspension was checked for the  
318 presence of chlamydospore-like cells using a light microscope.

319

320 **Confocal microscopy of germinated pycnidiospores and chlamydospore-like**  
321 **cells.** Confocal images were obtained using a Zeiss LSM 780 inverted microscope with  
322 ZEN Black 2012 software. An argon laser at 500 nm was used to excite GFP  
323 fluorescence and chloroplast autofluorescence with an emission wavelength of 490-535  
324 nm and 624-682 nm, respectively. Plants inoculated with GFP-tagged 1A5  
325 chlamydospore-like cells were checked at 24 hai to observe germination of the  
326 chlamydospore-like cells. The same confocal settings were used to determine whether  
327 pycnidiospores produced blastospores on the leaf surface. Wheat plants inoculated with  
328 GFP-tagged 3D7 pycnidiospores were checked at 24 and 48 hai.

329

## 330 **RESULTS**

331 **High temperature induces distinct morphologies in different *Z. tritici* strains.** We

332 exposed four different *Z. tritici* strains to high temperature. Three of the strains (1E4,

333 3D1, and 3D7) differentiated to filamentous growth at 27°C (Figure 1). The timing of the

334 hyphal transition ranged from 8 hai for 1E4, to 24 hai for 3D1 and 3D7 (Figure 1B and

335 C). Branching and hyphal elongation were frequently observed at 48 hai (Figure 1D, E,

336 and F). Surprisingly, high temperature promoted the formation of two new morphologies,

337 with appearances matching pseudohyphae and chlamyospores, in the 1A5 strain

338 (Figure 1E and F). These morphologies were not reported previously for this well-

339 studied pathogen. Chlamyospore-like cells were found for all strains at 144 hai (Figure

340 1F). Cellular differentiation from blastospores to pseudohyphae began in 1A5 at 24 hai,

341 resulting in a series of conjoined elongated cells, characteristic of pseudohyphae (Veses

342 & Gow, 2009) (Figure 1C). We also observed several swollen cells at 24 hai that we

343 believe represent the initial differentiation from blastospores into chlamyospore-like

344 cells (Figure 1C), but the complete differentiation occurred between 48 and 96 hai

345 (Figure 1D and E). Chlamyospore-like cells were observed at the ends of

346 pseudohyphae or distal parts of filamentous hyphae (Figure 1F). Chlamyospore-like

347 cells that were detached from suspensor cells were also found (data not shown).

348 Blastospores incubated in YSB at 18°C continued to replicate only as blastospores via

349 blastosporulation and were used as controls (Figure 1A).

350



351 **A nutrient-limited environment promotes filamentous growth.** Carbon- or nitrogen-  
352 depleted medium promoted hyphal growth in all four strains (Figure 2 and  
353 Supplementary Figure S1). In a carbon-depleted environment, cellular differentiation  
354 occurred after 24 hours of incubation (Figure 2). At 24 hai, hyphal formation was  
355 observed with the first hyphal branch formed terminally (1A5 and 3D1) or laterally (1E4  
356 and 3D7) (Figure 2B). Hyphal elongation and branching continued at 48 and 72 hai  
357 (data not shown). By 144 hai mycelial growth was predominant, with frequent  
358 anastomosis events among hyphae (Figure 2C). In MM with sucrose, all strains grew as  
359 a mixture of blastospores and hyphae, with blastospores budding from filamentous  
360 hyphae, showing that the morphological transition is bidirectional (Supplementary Figure  
361 S1C). Blastospores incubated in YSB continued to replicate only as blastospores via  
362 blastosporulation (Figure 2A).

363  
364 In nitrogen-depleted media, three strains (1A5, 3D1, and 3D7) initially formed hyphae  
365 from one apical end, generating the first and second hyphal elongations within 72 hai  
366 (Supplementary Figure S1B). 1E4 responded most quickly to a low nitrogen  
367 environment, with hyphae forming at 24 hai (Supplementary Figure S1A) and a network  
368 of filamentous hyphae formed at 72 hai (Supplementary Figure S1B). In regular MM all  
369 strains grew as a mixture of morphotypes (Supplementary Figure S1C). The hyphae  
370 induced under both carbon and nitrogen limitation (Figure 2 and Supporting information  
371 Figure S1) were thinner than those produced by high temperature (Figure 1).

372

373 **Oxidative stress induces morphological changes in some strains.** At a high initial  
374 cell density ( $10^5$  blastospores/mL), the presence of  $H_2O_2$  stimulated hyphal growth in  
375 1E4 up to a concentration of 5 mM (Supplementary Figure S2). 1A5, 3D1, and 3D7  
376 continued to replicate as blastospores, but there was a substantial reduction in  
377 blastospore formation starting at 5 mM  $H_2O_2$  (Supplementary Figure S2). To test  
378 whether a lower concentration of blastospores would change sensitivity to oxidative  
379 stress, we inoculated flasks with  $10^3$  blastospores/mL. After 72 hours of incubation in 0.5  
380 mM  $H_2O_2$ , strains 1E4 and 3D1 showed apical and lateral hyphal branching  
381 (Supplementary Figure S3), but both strains continued to form blastospores. At 1 mM,  
382 blastospores from 1E4, 3D1, and 3D7 developed into a mixture of pseudohyphae and  
383 regular hyphae (Supplementary Figure S3). The higher sensitivity at low cell densities  
384 suggests that the exogenous  $H_2O_2$  was more rapidly degraded by secreted  
385 hydroperoxidase proteins (catalases, peroxidases and catalase-peroxidase) when cell  
386 densities were 100X higher. The 1A5 strain did not switch to a different morphotype at  
387 any  $H_2O_2$  concentration, continuing to replicate as blastospores (Supplementary Figure  
388 S3). Starting at 2 mM  $H_2O_2$ , none of the strains changed their morphology  
389 (Supplementary Figure S3) and blastosporulation ceased (from 5 mM to 10 mM),  
390 suggesting a cytotoxic effect of  $H_2O_2$  at these concentrations.

391  
392 **Alkaline pH inhibits the morphological transition to hyphae.** Because we observed  
393 that *Z. tritici* does not change the pH of its medium, we inoculated blastospores into a  
394 non-buffered C-depleted medium. All four strains switched to hyphal growth when  
395 incubated at pH 5.8 (control) for 168 hours (Supplementary Figure S4A; Figure 2C).

396 Blastospores incubated at pH 4 also switched to filamentous hyphae, with no differences  
397 visible compared to the control samples (Supplementary Figure S4B). The  
398 morphological transition to hyphae was absent in all tested strains when incubated at pH  
399 8 (Supplementary Figure S4C), but we noticed that the cellular compartments of the  
400 blastospores were highly vacuolized in all strains (Supplementary Figure S4C).

401  
402 **Inoculum size effect suggests that quorum sensing may affect morphology.** We  
403 incubated all four strains at five cell densities in two growth conditions shown to induce  
404 hyphal growth. After 144 hours of incubation in C-depleted medium, we observed that  
405 morphology was independent of cell density for all four strains up to a concentration of  
406  $10^5$  blastospores/mL (Supplementary Figure S5A), with most of the blastospores  
407 switching to hyphal growth and forming mycelial colonies. However, when the initial cell  
408 density was  $\geq 10^6$  blastospores/mL, we observed a substantial reduction in the  
409 blastospore-to-hyphae transition and in hyphal length. No hyphae formed for 3D1 and  
410 3D7 at initial cell densities of  $10^7$  blastospores/mL, and they were clearly reduced for  
411 1E4 and 1A5 (Supplementary Figure S5A).

412  
413 In YSB at 27°C we also found that initial inoculum size affected cell morphology  
414 (Supplementary Figure S5B), though there were more pronounced differences among  
415 strains in this environment. At 144 hai, starting from the lowest initial cell density ( $10^3$   
416 blastospores/mL), we observed pseudohyphae formation in 1A5, 1E4, and 3D1, and a  
417 mixture of pseudohyphae and chlamydospore-like cells in 3D7. At an initial density of

418  $10^4$  blastospores/mL, the same phenotypes were found, except that 3D1 formed apical  
419 and lateral hyphae. Intermediate initial cell densities ( $10^5$  and  $10^6$  blastospores/mL)  
420 promoted hyphal growth for 1E4, 3D1 and 3D7, but the 3D7 strain grew as a mixture of  
421 mycelium and chlamyospore-like cells at  $10^6$  blastospores/mL. The increase of the  
422 inoculum size to  $10^7$  blastospores/mL induced formation of chlamyospore-like  
423 structures in 1E4 and 3D1, and a transition from blastospores to pseudohyphae and  
424 chlamyospore-like cells in 3D7. 1A5 was not able to switch to hyphae under high  
425 temperatures in any of the initial cell densities (Supplementary Figure S5B). The overall  
426 pattern of cell density dependence shown here suggests that a quorum sensing  
427 molecule may be controlling the morphological transition, as has been reported for other  
428 pleomorphic fungi (Hornby et al., 2004; Hornby et al., 2001; Wedge, Naruzawa, Nigg, &  
429 Bernier, 2016).

430  
431 **Mycelial growth is co-regulated with virulence-related genes.** Aiming to identify  
432 genes associated with mycelial growth in nutrient-poor environments, we analyzed the  
433 transcriptome signatures associated with blastospore and mycelial growth. The total  
434 number of sequencing reads and mapped reads per strain under different growth  
435 conditions is given in Supplementary Table S1. A total of 4888, 5296, 5323, and 6003  
436 genes were differentially expressed among all tested conditions in 1A5, 1E4, 3D1, and  
437 3D7, respectively. On average, 24% and 25% of the genes were upregulated during  
438 blastospore and mycelial growth, respectively.

439  
440 The upregulated genes shared among all four strains for each morphology were

441 selected based on pairwise comparisons. These genes were then analyzed using a  
442 Venn diagram. Two distinct sets of 134 genes shared among the four strains were  
443 identified in both comparisons. The first set is composed of genes that were upregulated  
444 during blastospore growth: these genes were upregulated in YSB compared to C-  
445 depleted medium, and were upregulated in YSB compared to the wheat infection, FDR  
446  $\leq 0.01$  (Supplementary Figure S6A and Table S2). The second set consists of genes that  
447 were upregulated during mycelial growth: these were upregulated in C-depleted medium  
448 compared to YSB, and were upregulated in wheat infection compared to YSB, FDR  
449  $\leq 0.01$  (Supplementary Figure S6B and Supplementary Table S3). For both comparisons,  
450 the sets of genes that do not overlap represent genes with a strain-specific expression  
451 profile.

452  
453 Among the 134 shared genes that are significantly upregulated during blastospore  
454 growth, 20% are annotated as *hypothetical proteins* (Figure 3A; Supplementary Table  
455 S2). The remaining 107 genes are divided in fourteen biological process categories, with  
456 *metabolism* the most represented term (44%). This category was composed mainly of  
457 non-secreted enzymes, including oxidoreductases (n=11), dehydrogenases (n=8),  
458 hydrolases (n=7), and transferases (n=9) (Figure 3A). No enrichment was found for any  
459 other category. However, seven genes from other categories were already described in  
460 other fungi to be involved in blastosporulation (Supplementary Table S4). As expected,  
461 genes related to vegetative blastospore growth were highly expressed in nutrient-rich  
462 medium - the environment most conducive for this morphotype (Supplementary Figure

463 S6C).

464

465 Among the 134 genes that were upregulated in all strains during mycelial growth, we  
466 observed an enrichment of secreted proteins (32%) known to be associated with fungal  
467 virulence, including *candidate effectors* (small secreted proteins - SSPs), *secreted*  
468 *proteases*, *secreted glycosidases*, *secreted chloroperoxidases*, *cell wall hydrolases*,  
469 *hydrophobins*, and *hydrophobic surface binding proteins* (Figure 3B and Supplementary  
470 Table S3). Overall, these virulence-associated genes were upregulated in C-depleted  
471 medium and during all stages of plant infection, albeit with a reduction in expression  
472 during the saprophytic phase of infection (at 28 dpi). The peak of expression preceded  
473 the first visual symptoms of infection, at 12 dpi for 1A5 and 3D7, and at 14 dpi for 1E4  
474 and 3D1 (Supplementary Figure S6D), as previously reported for some of these gene  
475 categories (Palma-Guerrero et al., 2017). These patterns suggest that mycelial growth is  
476 co-regulated with the expression of genes relevant for virulence even in the absence of  
477 the host. We also detected the upregulation of six genes related to cellular  
478 morphogenesis (Supplementary Table S5). The transcription profiles of these genes  
479 showed an upregulation in both mycelial growth conditions (C-depleted medium and  
480 plant infection at 7 dpi) with the peak of expression occurring at 7 dpi for all four strains  
481 (Supplementary Figure S6E).

482

483 **Chlamyospore-like cells are produced by *Z. tritici*.** We observed the formation of  
484 structures with the same morphology as chlamyospores that had never been  
485 previously reported in *Z. tritici*. We aimed to determine whether these chlamyospore-

486 like cells had properties associated with chlamyospores in other fungi.  
487 Chlamyospores are known to be survival structures that have thicker cell walls and a  
488 high content of lipid droplets (Bottcher, Pollath, Staib, Hube, & Brunke, 2016). We  
489 stained the different morphological cell types of 1A5 with the chitin-binding dye  
490 Calcofluor White (CFW) and the lipid droplets dye Nile Red (NR) to measure these  
491 properties. The intensity of CFW fluorescence was higher in chlamyospore-like cells  
492 (Figure 4A, B, and C) compared with blastospores, hyphae, and pseudohyphae that  
493 exhibited a weaker fluorescence for CFW (Figure 4). NR staining revealed that  
494 chlamyospore-like cells had a high content of lipid droplets, which was also observed  
495 for blastospores and pseudohyphae. On the contrary, hyphae showed a lower lipid  
496 droplet content than spores, with the exception of the hyphal branching zones (Figure 4)  
497 as has been reported for other fungi (Bago et al., 2002). We then examined the  
498 thickness of the cell walls for three cell types using TEM. TEM showed that the  
499 chlamyospore-like cells had thicker cell walls than blastospores and pycnidiospores  
500 (Figure 5). We also found that pseudohyphae and the elongated suspensor cells, where  
501 chlamyospores are usually attached to the surrounding mycelium, have a cell wall  
502 thickness similar to pycnidiospores (Figure 5). No differences were observed for the  
503 chlamyospore-like cells produced by the 1A5 and 3D7 strains. On average,  
504 chlamyospore-like cells produced by *Z. tritici* had a cell wall thickness of ~460 nm,  
505 about four times thicker than the cell walls found in blastospores and pycnidiospores.  
506 Despite the thickness of the cell wall, we could not differentiate an extra cell wall layer  
507 as reported in chlamyospores from other fungal species (Fabry, Schmid, Schrap, &

508 Ansorg, 2003; Sitton & Cook, 1981).

509

510 **The chlamyospore-like cells are metabolically active and highly stress tolerant.**

511 The chlamyospore-like cells of 1A5 germinated and produced hyphae. After 12 h of

512 incubation on WA plates, we observed germ tubes emerging from the chlamyospore-

513 like cells, which led to the development of hyphae at 24 hai (Figure 6B and C).

514 Blastospores used as controls initially germinated from one apical side, generating the

515 first and second germ tubes within 12 hai (Figure 6A). We inoculated wheat with

516 chlamyospore-like cells from GFP-tagged 1A5 to observe by confocal microscopy

517 whether these cells could germinate on the leaf surface. At 24 hpi, free chlamyospore-

518 like cells and chlamyospore-like cells still attached to a suspensor cell produced germ

519 tubes and hyphae on the surface of wheat leaves (Figure 6D). These results suggest

520 that chlamyospore-like cells may be able to cause infections.

521

522 We also investigated whether chlamyospore-like cells share other characteristics of

523 fungal resting spores, such as an ability to resist drought and temperature extremes.

524 Incubation for one day under drought stress reduced viability of blastospores and

525 pseudohyphae by 70%, while the chlamyospore-like cells had a reduction in cell

526 viability of only 23% (Figure 7A). These rates changed little after 3 days of drought

527 stress. After 5 days of drought stress, the survival rates were 10%, 19%, and 49% for

528 blastospores, pseudohyphae and chlamyospore-like cells, respectively (Figure 7A).

529 After 10 days of drought stress, the chlamyospore-like cells exhibited a survival rate of

530 50%, significantly higher than the other cell types (Figure 7A). In the cold stress



531 experiment, only the chlamyospore-like cells survived the cold shock, with no  
532 statistically significant difference in the survival rates of 23%, 17%, and 19% after 1 min,  
533 2 min and 3 min in liquid nitrogen, respectively (Figure 7B). In the heat stress  
534 experiment, 30°C affected blastospores and chlamyospore-like cells equally, but the  
535 35°C treatment killed all the blastospores while chlamyospore-like cells and  
536 pseudohyphae survived at rates of 12% and 6%, respectively (Figure 7C). None of the  
537 morphotypes survived at 40°C (Figure 7C). For all tested environmental stresses,  
538 chlamyospore-like cells were the morphotype that exhibited the highest survival rate,  
539 suggesting that this structure exhibits ecological characteristics typical for fungal resting  
540 spores that enable improved survival to different stresses encountered in nature.

541  
542 **Chlamyospore-like cells form on wheat plants during the infection process.**

543 Wheat plants were inoculated with pycnidiospores of all four strains and kept in a  
544 greenhouse chamber until pycnidia formation. Microscopic examination of the spore  
545 solution harvested from 20-day old infected leaves showed the presence of  
546 chlamyospore-like cells mixed among the pycnidiospores (Supplementary Figure S7).  
547 We observed free chlamyospore-like cells (Supplementary Figure S7A), as well as  
548 germinating chlamyospore-like cells (Supplementary Figure S7B), with some still  
549 attached to suspensor cells (Supplementary Figure S7B).

550  
551 **Germinating pycnidiospores produce blastospores on the surface of wheat**  
552 **leaves.** Pycnidiospores of a GFP-tagged 3D7 strain were inoculated onto wheat plants  
553 and monitored using confocal microscopy. At 24 hai, we observed the expected

554 pycnidiospore germination and initial hyphal branching, but we also observed newly-  
555 budding blastospores (Figure 8A). After 48 hours, there was an increase in the number  
556 of budding points on germinated pycnidiospores, and an increase in the number of free  
557 blastospores visible on the leaf (Figure 8B). This suggests that pycnidiospores of *Z.*  
558 *tritici* can germinate to produce additional blastospores even before penetration of the  
559 wheat leaf, providing an alternative mechanism for splash-dispersal of infective  
560 propagules and potentially providing a substantial increase in the total inoculum load  
561 associated with an infection cycle. At 48 hpi we also noticed many anastomosis events  
562 between pycnidiospores and new blastospores (Figure 8B).

563

## 564 **DISCUSSION**

565 Fungi evolved to perceive a wide array of environmental signals and reprogram their  
566 cellular responses accordingly in order to maximize their fitness. Though much research  
567 has been oriented around morphological changes and their associated transcriptional  
568 pathways in response to different stressors in fungal pathogens of humans (Biswas, Van  
569 Dijck, & Datta, 2007; Klein & Tebbets, 2007; Noble et al., 2017), knowledge in this area  
570 is limited for plant pathogens. Our study shows how different environments can affect  
571 cellular morphologies in the wheat pathogen *Z. tritici*. We also demonstrate the  
572 phenotypic plasticity of this fungus in response to environmental changes, as well as  
573 differential responses to the same environments among strains. An unexpected  
574 outcome of this study was the discovery of two novel morphotypes, one of which may  
575 have important epidemiological implications.

576

577 We found that several environmental factors can affect morphological transitions in  
578 strain-specific ways for four natural *Z. tritici* strains sampled from the same Swiss  
579 population. All four strains switched to hyphal growth in a nutrient-poor minimal medium,  
580 suggesting that nutritional limitation may best simulate the conditions encountered by  
581 spores on the leaf surface. Morphological changes induced by limited nutrients has also  
582 been described in other dimorphic plant pathogenic fungi distributed across different  
583 phyla (Gauthier, 2015; Nadal et al., 2008). Nutrients are known to be present on the leaf  
584 surface in very small quantities and are usually surrounded by epicuticular waxes  
585 (Derridj, 1996). As a result, plant pathogens typically experience nutrient limitations  
586 while growing on leaves. It is thought that secreted enzymes, including plant cell wall  
587 degrading enzymes (PCWDEs) such as cutinases, are required to obtain nutrients  
588 during this stage of development, but *Z. tritici* has few PCWDEs compared to other fungi  
589 (Ohm et al., 2012), suggesting that the perception of a nutrient-limited environment may  
590 act as a stimulus to induce a switch to an exploratory morphotype (hyphae) that can  
591 better explore the environment for food. We found a significant increase in the  
592 frequency of anastomosis events during mycelium formation under nutrient-limited  
593 conditions. Mycelial networks formed by anastomosis enable a shared cytoplasmic flow  
594 that can more efficiently distribute water, nutrients, and signals within a fungal colony  
595 (Fleissner et al., 2005; Glass, Rasmussen, Roca, & Read, 2004). Moreover, hyphal  
596 fusions were shown to be required for virulence for some plant pathogens (Craven,  
597 Velez, Cho, Lawrence, & Mitchell, 2008; Prados Rosales & Di Pietro, 2008). We  
598 hypothesize that hyphal anastomosis provides benefits during epiphytic growth of  
599 germinating *Z. tritici* pycnidiospores prior to stomatal penetration, with anastomosis

600 facilitating colony establishment and increasing strain fitness during colonization of the  
601 host.

602  
603 The oxidative burst is a ubiquitous plant defense response to pathogen infection,  
604 resulting in a rapid release of reactive oxygen species (ROS), including hydrogen  
605 peroxide ( $H_2O_2$ ) (Shetty et al., 2007). The ROS produced during plant defense were  
606 proposed to have various functions, including activation of plant defense-related genes  
607 and production of phytoalexins in addition to a direct antimicrobial effect that inhibits  
608 pathogen growth (Fones & Preston, 2012; Lamb & Dixon, 1997; Yang et al., 2017).  
609 Though many studies have demonstrated its antimicrobial effects, the effects of  $H_2O_2$  on  
610 morphological transitions remains largely unexplored. In *Candida albicans*,  $H_2O_2$  induces  
611 hyphal differentiation in a dose-dependent manner (Nasution et al., 2008). Our results  
612 show that blastospores of three out of four *Z. tritici* strains switch to hyphae and  
613 pseudohyphae when exposed to  $H_2O_2$  in a dose-dependent manner. A cell density  
614 dependence was also found. The different cell density responses suggest that the  $H_2O_2$   
615 is more rapidly metabolized by fungal hydroperoxidase proteins (catalases, peroxidases  
616 and catalase-peroxidase), leading to lower toxicity at higher cell densities. Several  
617 genes encoding peroxidases and catalase-peroxidases were identified in the genome of  
618 *Z. tritici* (Levy, Eyal, & Hochman, 1992; Morais do Amaral, Antoniw, Rudd, & Hammond-  
619 Kosack, 2012), which may explain the observed phenotype. The inability of 1A5 to  
620 differentiate hyphae from blastospores at any  $H_2O_2$  concentration suggests that this  
621 strain either cannot sense oxidative stress or that it possesses a more efficient

622 antioxidant response that can neutralize the effects of H<sub>2</sub>O<sub>2</sub>. Further experiments will be  
623 needed to test these hypotheses.

624  
625 Fungal pathogens also need to be able to adapt to different pHs found in different  
626 environments. pH is known to affect many physiological functions in fungi, including  
627 growth and cell wall remodeling (Bignell, 2012). In *C. albicans*, a signaling pathway  
628 controlling pH-responsive genes is regulated by the ambient pH, where an acidic pH  
629 induces yeast-like growth and a neutral-alkaline pH favors formation of hyphae (Biswas  
630 et al., 2007). Our results show that blastospores of *Z. tritici* respond differently to pH  
631 than *C. albicans* yeast cells. Acidic pH did not affect the transition to hyphal growth  
632 whereas alkaline pH repressed the formation of hyphae. The repression of hyphal  
633 growth by alkaline pH was also reported for the dimorphic plant pathogen *Ustilago*  
634 *maydis* (Ruiz-Herrera, Leon, Guevara-Olvera, & Carabez-Trejo, 1995). Alkaline pH not  
635 only repressed the transition to hyphal growth in *Z. tritici*, but it also induced high  
636 vacuolization of the blastospores. Changes in vacuole morphology and physiology have  
637 been related to defects on hyphal growth and virulence in fungal pathogens of humans  
638 and plants (Richards, Gow, & Veses, 2012; Veses & Gow, 2008). Therefore, the high  
639 vacuolization by alkaline pH may explain the repression of hyphal growth observed in  
640 this condition. pH responses remain poorly understood in the *Z. tritici*-wheat  
641 pathosystem, but the leaf surface and apoplast colonized by *Z. tritici* during infection are  
642 usually neutral-acidic environments (Edwards & Bowling, 1986). We hypothesize that *Z.*  
643 *tritici* is better adapted to colonize an acidic pH environment than an alkaline  
644 environment.

645  
646 Temperature is an important abiotic factor that strongly affects growth, reproduction, and  
647 development in fungi (Lendenmann, Croll, Palma-Guerrero, Stewart, & McDonald, 2016;  
648 Ponomarenko, Goodwin, & Kema, 2011). Thermally dimorphic human fungal pathogens  
649 usually undergo morphological transitions in response to host temperature (Gauthier,  
650 2015; Nemecek, Wüthrich, & Klein, 2006), but temperature has not been reported to  
651 affect the cell morphology of fungal plant pathogens. *Z. tritici* is the first plant pathogen  
652 shown to undergo morphological transitions after exposure to high temperatures  
653 (Lendenmann et al., 2016; Motteram et al., 2011). Our experiments showed that a  
654 change in temperature from 18°C to 27°C triggered hyphal growth in three out of four  
655 tested *Z. tritici* strains. For these three strains, an increase in hyphal elongation and  
656 formation of branches occurred soon after exposure to the higher temperature. The  
657 hyphae formed at a high temperature appeared thicker than those formed under  
658 nutrient limitations and it is not clear if they would be able to cause infections.

659  
660 We used transcriptome sequencing to identify genes associated with mycelial growth in  
661 *Z. tritici*. It was shown in other plant pathogenic fungi that starvation induces the  
662 expression of virulence-related genes (Coleman, Henricot, Arnau, & Oliver, 1997;  
663 Talbot, Ebole, & Hamer, 1993). In *Z. tritici*, we found that genes relevant for virulence,  
664 including secreted hydrolytic proteins and candidate effectors, were upregulated in both  
665 hyphae-inducing conditions (carbon-depleted medium and *in planta*), suggesting that  
666 genes controlling morphogenesis and virulence may be co-regulated under nutrient-  
667 limited conditions. In *C. albicans*, genes related to hyphal growth are co-regulated by

668 transcription factors that affect expression of genes involved in virulence (Kumamoto &  
669 Vinces, 2005; Thompson et al., 2011). However, it is important to note that not every  
670 virulence function is connected to morphogenesis. The specific genes involved in the  
671 activation and regulation of these morphological transitions remain unknown for *Z. tritici*.

672  
673 An unexpected outcome of this study was the discovery of chlamyospore-like cells in *Z.*  
674 *tritici*. The preponderance of evidence indicates that these cells are truly  
675 chlamydozoospores. Their morphology matched the chlamydozoospores described in other  
676 fungi: spherical, thick-walled cells with a high lipid content that form either intercalated or  
677 at the ends of filamentous hyphae and occasionally on pseudohyphae (Lin & Heitman,  
678 2005; Martin, Douglas, & Konopka, 2005). We also showed that these cells were able to  
679 survive several stresses that killed other cell types, including desiccation and high and  
680 low temperatures, consistent with the function of chlamydozoospores as long-term survival  
681 structures in other fungi (Couteaudier & Alabouvette, 1990; Lin & Heitman, 2005;  
682 McNeel et al., 1983; Oliveira, Aguiar, Tessmann, Pujade-Renaud, & Vida, 2012). We  
683 conclude that *Z. tritici* produces chlamydozoospores.

684  
685 This is the first time that chlamydozoospores have been found in a plant pathogen that is  
686 thought to mainly inhabit the phyllosphere. Though chlamydozoospores were especially  
687 prominent in the 1A5 strain at high temperature, we observed chlamydozoospore production  
688 in all four strains both *in vitro* and *in planta*. We hypothesize that the chlamydozoospores  
689 produced by *Z. tritici* may contribute an important source of inoculum that can survive  
690 between growing seasons and perhaps form a long-term spore-bank that can persist for

691 many years in wheat-growing regions. These properties could impact the management  
692 of Septoria Tritici Blotch (STB), but additional studies will be needed to understand the  
693 roles played by chlamydospores during the disease cycle of this pathogen.

694  
695 Another finding with epidemiological implications was to demonstrate that blastospores  
696 can form from germinating pycnidiospores on the surface of wheat leaves. This  
697 possibility was proposed more than 30 years ago (Annone, 1987; Djerbi, 1977), but was  
698 not followed up in subsequent studies. The formation of blastospores during *in vitro*  
699 growth in nutrient-rich medium is why *Z. tritici* has long been considered to be a  
700 dimorphic fungus. But until now it was not clear if the blastospores could also form on  
701 leaf surfaces in nature. Our experiments confirmed that blastospores are produced  
702 during a natural infection, but it remains unclear whether they make a significant  
703 contribution to the development of epidemics. Given their small size and increasing  
704 abundance over time, we hypothesize that they may play an important role in the  
705 explosive increase in STB that can occur following prolonged rainy periods that last for  
706 several days (Annone, 1987; Jones & LEE, 1974).

707  
708 In conclusion, we demonstrate that *Z. tritici* responds morphologically to diverse  
709 environmental stimuli, and we propose distinct biological roles for different morphotypes.  
710 We also illustrate the advantage of including different natural strains when studying the  
711 response of a species to environmental factors, as we found different morphological  
712 responses among the tested strains. Our findings provide important new insights into the  
713 *Z. tritici*-wheat pathosystem including: 1) the phenotypic plasticity of *Z. tritici* in response



714 to different environmental changes; 2) the reclassification of *Z. tritici* as a pleomorphic  
715 fungus due to its ability to produce four distinct morphotypes; 3) the discovery of  
716 chlamydospores that may help the fungus to survive stressful conditions; 4) the  
717 formation of blastospores from germinating pycnidiospores on the surface of wheat  
718 leaves, enabling a potentially significant increase in inoculum size. These findings  
719 position *Z. tritici* as a good model organism to explore how morphological changes can  
720 affect adaptation to different environments in fungal plant pathogens.

721

## 722 **ACKNOWLEDGEMENTS**

723 Carolina S. Francisco was supported by a PhD research fellowship from CAPES - Brazil  
724 (process n° 002087/2015-04). We thank Andrea Sanchez-Vallet for providing the  
725 fluorescent *Z. tritici* Swiss strains used in this study and for her critical reading of the  
726 manuscript. We also thank Lukas Meile, Julien P. L. Alassimone, and Danilo A. Pereira  
727 for discussions in the course of this work. RNA processing and sequencing were  
728 performed in the Genetic Diversity Center (GDC) of ETH Zurich and the Genomics  
729 Facility of ETH Basel, respectively. Transmission electron microscopy (TEM) and  
730 confocal microscopy were performed at the Scientific Center for Optical and Electron  
731 Microscopy (ScopeM) of ETH Zurich.

732

733

## 734 **REFERENCES**

735 Anders, S., Pyl, P. T., & Huber, W. (2015). HTSeq--a Python framework to work with  
736 high-throughput sequencing data. *Bioinformatics*, 31(2), 166-169.  
737 doi:10.1093/bioinformatics/btu638

- 738  
739 Annone, J. (1987). *Observacion de conidios se cundarios de Septoria tritici Rob. ex*  
740 *Desm. por medio de impresiones foliareas*. Paper presented at the In: Kohli M. M.  
741 & van Beuningen L. T. (Eds.). In: Conferencia regional sobre la septoriosis del  
742 trigo, Montevideo, pp. 80-87.  
743
- 744 Bago, B., Zipfel, W., Williams, R. M., Jun, J., Arreola, R., Lammers, P. J., . . . Shachar-  
745 Hill, Y. (2002). Translocation and utilization of fungal storage lipid in the  
746 arbuscular Mycorrhizal symbiosis. *Plant Physiology*, 128(1), 108-124.  
747 doi:10.1104/pp.010466  
748
- 749 Bignell, E. (2012). The molecular basis of pH sensing, signaling, and homeostasis in  
750 fungi. *Advances in Applied Microbiology*, 79, 1-18. doi:10.1016/B978-0-12-  
751 394318-7.00001-2  
752
- 753 Biswas, S., Van Dijck, P., & Datta, A. (2007). Environmental sensing and signal  
754 transduction pathways regulating morphopathogenic determinants of *Candida*  
755 *albicans*. *Microbiology and Molecular Biology Reviews*, 71(2), 348-376.  
756 doi:10.1128/MMBR.00009-06  
757
- 758 Bolger, A. M., Lohse, M., & Usadel, B. (2014). Trimmomatic: a flexible trimmer for  
759 Illumina sequence data. *Bioinformatics*, 30(15), 2114-2120.  
760 doi:10.1093/bioinformatics/btu170  
761
- 762 Bottcher, B., Pollath, C., Staib, P., Hube, B., & Brunke, S. (2016). *Candida* species  
763 rewired hyphae developmental programs for chlamydospore formation. *Frontiers*  
764 *in Microbiology*, 7, 1697. doi:10.3389/fmicb.2016.01697  
765
- 766 Brand, A. (2012). Hyphal growth in human fungal pathogens and its role in virulence.  
767 *International Journal of Microbiology*, 1-11. doi:10.1155/2012/517529  
768
- 769 Brown, A. J. P., Cowen, L. E., di Pietro, A., & Quinn, J. (2017). Stress Adaptation.  
770 *Microbiology Spectrum*, 5(4). doi:10.1128/microbiolspec.FUNK-0048-2016  
771
- 772 Choi, Y. E., & Goodwin, S. B. (2011). Gene encoding a c-Type cyclin in *Mycosphaerella*  
773 *graminicola* is involved in aerial mycelium formation, filamentous growth, hyphal  
774 swelling, melanin biosynthesis, stress response, and pathogenicity. *Molecular*  
775 *Plant-Microbe Interactions*, 24(4), 469-477. doi:1094/MPMI-04-10-0090  
776
- 777 Coleman, M., Henricot, B., Arnau, J., & Oliver, R. P. (1997). Starvation-induced genes of  
778 the tomato pathogen *Cladosporium fulvum* are also induced during growth in  
779 planta. *Molecular Plant-Microbe Interaction*, 10(9), 1106-1109. doi:  
780 1094/MPMI.1997.10.9.1106  
781

- 782 Cousin, A., Mehrabi, R., Guilleroux, M., Dufresne, M., T, V. D. L., Waalwijk, C., . . .  
783 Kema, G. H. (2006). The MAP kinase-encoding gene MgFus3 of the non-  
784 appressorium phytopathogen *Mycosphaerella graminicola* is required for  
785 penetration and *in vitro* pycnidia formation. *Molecular Plant Pathology*, 7(4),  
786 269-278. doi:10.1111/j.1364-3703.2006.00337.x  
787
- 788 Couteaudier, Y., & Alabouvette, C. (1990). Survival and inoculum potential of conidia  
789 and chlamydo-spores of *Fusarium oxysporum* f.sp. *lini* in soil. *Canadian Journal of*  
790 *Microbiology*, 36(8), 551-556. doi:10.1139/m90-096  
791
- 792 Craven, K. D., Velez, H., Cho, Y., Lawrence, C. B., & Mitchell, T. K. (2008). Anastomosis  
793 is required for virulence of the fungal necrotroph *Alternaria brassicicola*.  
794 *Eukaryotic Cell*, 7(4), 675-683. doi:10.1128/EC.00423-07  
795
- 796 Croll, D., Zala, M., & McDonald, B. A. (2013). Breakage-fusion-bridge cycles and large  
797 insertions contribute to the rapid evolution of accessory chromosomes in a fungal  
798 pathogen. *PLoS Genetics*, 9(6), e1003567. doi:10.1371/journal.pgen.1003567  
799
- 800 Derridj, S. (1996). Nutrients on the leaf surface. In: Morris C. E., Nicot P. C., & Nguyen-  
801 The C. (Eds.). *Aerial Plant Surface Microbiology* (pp. 25-42). New York: Plenum  
802 Press.  
803
- 804 Djerbi, M. (1977). Épidémiologie du *Septoria tritici* Rob. et Desm. Conservation et mode  
805 de formation de l'inoculum primaire. *Société Française de Phytopathologie*, 91-  
806 101.  
807
- 808 Edwards, J. A., Chen, C., Kemski, M. M., Hu, J., Mitchell, T. A., & Rappleye, C. A.  
809 (2013). Histoplasma yeast and mycelial transcriptomes reveals pathogenic-phase  
810 and lineage-specific gene expression profiles. *BMC Genomics*, 14(695), 1-19.  
811 doi: 10.1186/1471-2164-14-695  
812
- 813 Edwards, M. C., & Bowling, D. J. F. (1986). The growth of rust germ tubes towards  
814 stomata in relation to pH gradients. *Physiological and Molecular Plant Pathology*,  
815 29, 185-196. doi:10.1016/S0048-4059(86)80020-0  
816
- 817 Fabry, W., Schmid, E. N., Schraps, M., & Ansorg, R. (2003). Isolation and purification of  
818 chlamydo-spores of *Candida albicans*. *Medical Mycology*, 41, 53-58.  
819 doi:10.1080/mmy.41.1.53.58  
820
- 821 Fleissner, A., Sarkar, S., Jacobson, D. J., Roca, M. G., Read, N. D., & Glass, N. L.  
822 (2005). The so locus is required for vegetative cell fusion and postfertilization  
823 events in *Neurospora crassa*. *Eukaryotic Cell*, 4(5), 920-930.  
824 doi:10.1128/EC.4.5.920-930.2005  
825

- 826 Fones, H., & Gurr, S. (2015). The impact of Septoria Tritici Blotch disease on wheat: An  
827 EU perspective. *Fungal Genetics and Biology*, 79, 3-7.  
828 doi:10.1016/j.fgb.2015.04.004  
829
- 830 Fones, H., & Preston, G. M. (2012). Reactive oxygen and oxidative stress tolerance in  
831 plant pathogenic Pseudomonas. *FEMS Microbiology Letters*, 327(1), 1-8.  
832 doi:10.1111/j.1574-6968.2011.02449.x  
833
- 834 Gancedo, J. M. (2001). Control of pseudohyphae formation in *Saccharomyces*  
835 *cerevisiae*. *FEMS Microbiol Rev*, 25, 107-123. doi:10.1111/j.1574-  
836 6976.2001.tb00573.x  
837
- 838 Gauthier, G. M. (2015). Dimorphism in fungal pathogens of mammals, plants, and  
839 insects. *PLoS Pathogens*, 11(2), e1004608. doi:10.1371/journal.ppat.1004608  
840
- 841 Glass, N. L., Rasmussen, C., Roca, M. G., & Read, N. D. (2004). Hyphal homing, fusion  
842 and mycelial interconnectedness. *Trends in Microbiology*, 12(3), 135-141.  
843 doi:10.1016/j.tim.2004.01.007  
844
- 845 Grandaubert, J., Bhattacharyya, A., & Stukenbrock, E. H. (2015). RNA-seq based gene  
846 annotation and comparative genomics of four fungal grass pathogens in the  
847 genus Zymoseptoria identify novel orphan genes and species-specific invasions  
848 of transposable elements. *G3 (Bethesda)*, 5(7), 1323-1333.  
849 doi:10.1534/g3.115.017731  
850
- 851 Hoes, J. A. (1971). Development of chlamydospores in *Verticillium nigrescens* and  
852 *Verticillium nubilum*. *Canadian Journal of Botany*, 49, 1863-1866.  
853 doi:10.1139/b71-263  
854
- 855 Hornby, J. M., Jacobitz-Kizzier, S. M., McNeel, D. J., Jensen, E. C., Treves, D. S., &  
856 Nickerson, K. W. (2004). Inoculum size effect in dimorphic fungi: extracellular  
857 control of yeast-mycelium dimorphism in *Ceratocystis ulmi*. *Applied and*  
858 *Environmental Microbiology*, 70(3), 1356-1359. doi:10.1128/aem.70.3.1356-  
859 1359.2004  
860
- 861 Hornby, J. M., Jensen, E. C., Lisec, A. D., Tasto, J. J., Jahnke, B., Shoemaker, R., . . .  
862 Nickerson, K. W. (2001). Quorum sensing in the dimorphic fungus *Candida*  
863 *albicans* is mediated by farnesol. *Applied and Environmental Microbiology*, 67(7),  
864 2982-2992. doi:10.1128/AEM.67.7.2982-2992.2001  
865
- 866 Jones, D. G., & LEE, N. P. (1974). Production of secondary conidia by *Septoria tritici* in  
867 culture. *Transactions British Mycological Society*, 62(1), 212-213.  
868 doi:10.1016/S0007-1536(74)80025-2  
869

- 870 Kema, G. H., Yu, D., Frits, H. J. R., Shaw, M. W., & Baayen, R. P. (1996). Histology of  
871 the pathogenesis of *Mycosphaerella graminicola* in wheat. *Biochemistry and Cell*  
872 *Biology*, *86*, 777-786.
- 873
- 874 Kilaru, S., Schuster, M., Ma, W., & Steinberg, G. (2017). Fluorescent markers of various  
875 organelles in the wheat pathogen *Zymoseptoria tritici*. *Fungal Genetics and*  
876 *Biology*, *105*, 16-27. doi:10.1016/j.fgb.2017.05.001
- 877
- 878 King, R., Urban, M., Lauder, R. P., Hawkins, N., Evans, M., Plummer, A., . . . Rudd, J. J.  
879 (2017). A conserved fungal glycosyltransferase facilitates pathogenesis of plants  
880 by enabling hyphal growth on solid surfaces. *PLoS Pathogens*, *13*(10),  
881 e1006672. doi:10.1371/journal.ppat.1006672
- 882
- 883 Klein, B. S., & Tebbets, B. (2007). Dimorphism and virulence in fungi. *Current Opinion in*  
884 *Microbiology*, *10*(4), 314-319. doi:10.1016/j.mib.2007.04.002
- 885
- 886 Kumamoto, C. A., & Vences, M. D. (2005). Contributions of hyphae and hypha-co-  
887 regulated genes to *Candida albicans* virulence. *Cell Microbiology*, *7*(11), 1546-  
888 1554. doi:10.1111/j.1462-5822.2005.00616.x
- 889
- 890 Lamb, C., & Dixon, R. A. (1997). The oxidative burst in plant disease resistance. *Annual*  
891 *Review of Plant Physiology and Molecular Biology*, *48*, 251-275.  
892 doi:10.1146/annurev.arplant.48.1.251
- 893
- 894 Lendenmann, M. H., Croll, D., Palma-Guerrero, J., Stewart, E. L., & McDonald, B. A.  
895 (2016). QTL mapping of temperature sensitivity reveals candidate genes for  
896 thermal adaptation and growth morphology in the plant pathogenic fungus  
897 *Zymoseptoria tritici*. *Heredity (Edinb)*, *116*(4), 384-394. doi:10.1038/hdy.2015.111
- 898
- 899 Levy, E., Eyal, Z., & Hochman, A. (1992). Purification and characterization of a catalase-  
900 peroxidase from the fungus *Septoria tritici*. *Archives of Biochemistry and*  
901 *Biophysics*, *296*(1), 321-327. doi:10.1016/0003-9861(92)90579-L
- 902
- 903 Lin, X., Alspaugh, J. A., Liu, H., & Harris, S. (2014). Fungal morphogenesis. *Cold Spring*  
904 *Harbor Perspectives in Medicine*, *5*(2), a019679.  
905 doi:10.1101/cshperspect.a019679
- 906
- 907 Lin, X., & Heitman, J. (2005). Chlamydospore formation during hyphal growth in  
908 *Cryptococcus neoformans*. *Eukaryotic Cell*, *4*(10), 1746-1754.  
909 doi:10.1128/EC.4.10.1746-1754.2005
- 910
- 911 Lübbehüsen, T. L., Nielsen, J., & McIntyre, M. (2003). Morphology and physiology of the  
912 dimorphic fungus *Mucor circinelloides* (syn. *M. racemosus*) during anaerobic  
913 growth. *Mycological Research*, *107*(2), 223-230.  
914 doi:10.1017/s0953756203007299

- 915  
916 Martin, S. W., Douglas, L. M., & Konopka, J. B. (2005). Cell cycle dynamics and quorum  
917 sensing in *Candida albicans* chlamydospores are distinct from budding and  
918 hyphal growth. *Eukaryotic Cell*, 4(7), 1191-1202. doi:10.1128/EC.4.7.1191-  
919 1202.2005
- 920  
921 Mayer, F. L., Wilson, D., & Hube, B. (2013). *Candida albicans* pathogenicity  
922 mechanisms. *Virulence*, 4(2), 119-128. doi:10.4161/viru.22913
- 923  
924 McNeel, D. J., Kulkarni, R. K., & Nickerson, K. W. (1983). Pleomorphism in *Ceratocystis*  
925 *ulmi*: chlamydospore formation. *Canadian Journal of Botany*, 61(5), 1349-1352.  
926 doi:10.1139/b83-143
- 927  
928 Mehrabi, R., Ben M'Barek, S., van der Lee, T. A., Waalwijk, C., de Wit, P. J., & Kema, G.  
929 H. (2009). G(alpha) and Gbeta proteins regulate the cyclic AMP pathway that is  
930 required for development and pathogenicity of the phytopathogen  
931 *Mycosphaerella graminicola*. *Eukaryotic Cell*, 8(7), 1001-1013.  
932 doi:10.1128/EC.00258-08
- 933  
934 Mehrabi, R., & Kema, G. H. (2006). Protein kinase A subunits of the ascomycete  
935 pathogen *Mycosphaerella graminicola* regulate asexual fructification,  
936 filamentation, melanization and osmosensing. *Molecular Plant Pathology*, 7(6),  
937 565-577. doi:10.1111/j.1364-3703.2006.00361.x
- 938  
939 Mehrabi, R., van der Lee, T., Waalwijk, C., & Kema, G. H. (2006). MgSlit2, a cellular  
940 integrity MAP kinase gene of the fungal wheat pathogen *Mycosphaerella*  
941 *graminicola*, is dispensable for penetration but essential for invasive growth.  
942 *Molecular Plant-Microbe Interactions*, 19(4), 389-398. doi:1094/MPMI-19-0389
- 943  
944 Mehrabi, R., Zwiers, L. H., de Waard, M. A., & Kema, G. H. (2006). MgHog1 regulates  
945 dimorphism and pathogenicity in the fungal wheat pathogen *Mycosphaerella*  
946 *graminicola*. *Molecular Plant-Microbe Interactions*, 19(11), 1262-1269.  
947 doi:10.1094/MPMI-19-1262
- 948  
949 Meile, L., Croll, D., Brunner, P. C., Plissonneau, C., Hartmann, F. E., McDonald, B. A., &  
950 Sanchez-Vallet, A. (2018). A fungal avirulence factor encoded in a highly plastic  
951 genomic region triggers partial resistance to Septoria Tritici Blotch. *New*  
952 *Phytologist*, 219, 1048-1061. doi:10.1111/nph.15180
- 953  
954 Mirzadi Gohari, A., Mehrabi, R., Robert, O., Ince, I. A., Boeren, S., Schuster, M., . . .  
955 Kema, G. H. (2014). Molecular characterization and functional analyses of  
956 ZtWor1, a transcriptional regulator of the fungal wheat pathogen *Zymoseptoria*  
957 *tritici*. *Molecular Plant Pathology*, 15(4), 394-405. doi:10.1111/mpp.12102
- 958

- 959 Miyaji, M., Sano, A., & Sharmin, S. (2003). The role of chlamydospores of  
960 *Paracoccidioides brasiliensis*. *Japanese Journal of Medical Mycology*, *44*, 133-  
961 138. doi:10.3314/jjmm.44.133  
962
- 963 Mohammadi, N., Mehrabi, R., Mirzadi Gohari, A., Mohammadi Goltapeh, E., Safaie, N.,  
964 & Kema, G. H. J. (2017). The ZtVf1 transcription factor regulates development  
965 and virulence in the foliar wheat pathogen *Zymoseptoria tritici*. *Fungal Genetics*  
966 *and Biology*, *109*, 26-35. doi:10.1016/j.fgb.2017.10.003  
967
- 968 Morais do Amaral, A., Antoniw, J., Rudd, J. J., & Hammond-Kosack, K. E. (2012).  
969 Defining the predicted protein secretome of the fungal wheat leaf pathogen  
970 *Mycosphaerella graminicola*. *PLoS One*, *7*(12), e49904.  
971 doi:10.1371/journal.pone.0049904  
972
- 973 Motteram, J., Lovegrove, A., Pirie, E., Marsh, J., Devonshire, J., van de Meene, A., . . .  
974 Rudd, J. J. (2011). Aberrant protein N-glycosylation impacts upon infection-  
975 related growth transitions of the haploid plant-pathogenic fungus *Mycosphaerella*  
976 *graminicola*. *Molecular Microbiology*, *81*(2), 415-433. doi:10.1111/j.1365-  
977 2958.2011.07701.x  
978
- 979 Nadal, M., Garcia-Pedrajas, M. D., & Gold, S. E. (2008). Dimorphism in fungal plant  
980 pathogens. *FEMS Microbiology Letters*, *284*(2), 127-134. doi:10.1111/j.1574-  
981 6968.2008.01173.x  
982
- 983 Nasution, O., Srinivasa, K., Kim, M., Kim, Y. J., Kim, W., Jeong, W., & Choi, W. (2008).  
984 Hydrogen peroxide induces hyphal differentiation in *Candida albicans*. *Eukaryotic*  
985 *Cell*, *7*(11), 2008-2011. doi:10.1128/EC.00105-08  
986
- 987 Nemecek, J. C., Wüthrich, M., & Klein, B. S. (2006). Global control of dimorphism and  
988 virulence in fungi. *Science*, *312*, 583-588. doi:10.1126/science.1124105  
989
- 990 Nigg, M., Laroche, J., Landry, C. R., & Bernier, L. (2015). RNAseq analysis highlights  
991 specific transcriptome signatures of yeast and mycelial growth phases in the  
992 Dutch Elm Disease fungus *Ophiostoma novo-ulmi*. *G3 (Bethesda)*, *5*(11), 2487-  
993 2495. doi:10.1534/g3.115.021022  
994
- 995 Noble, S. M., Gianetti, B. A., & Witchley, J. N. (2017). *Candida albicans* cell-type  
996 switching and functional plasticity in the mammalian host. *Nature Reviews*  
997 *Microbiology*, *15*(2), 96-108. doi:10.1038/nrmicro.2016.157  
998
- 999 Ohm, R. A., Feau, N., Henrissat, B., Schoch, C. L., Horwitz, B. A., Barry, K. W., . . .  
1000 Grigoriev, I. V. (2012). Diverse lifestyles and strategies of plant pathogenesis  
1001 encoded in the genomes of eighteen Dothideomycetes fungi. *PLoS Pathogens*,  
1002 *8*(12), e1003037. doi:10.1371/journal.ppat.1003037  
1003

- 1004 Oliveira, R. R., Aguiar, B. M., Tessmann, D. J., Pujade-Renaud, V., & Vida, J. B. (2012).  
1005 Chlamydo spores formation by *Corynespora cassiicola*. *Tropical Plant Pathology*,  
1006 37(6), 415-418. doi:10.1590/S1982-56762012000600006  
1007
- 1008 Palma-Guerrero, J., Ma, X., Torriani, S. F., Zala, M., Francisco, C. S., Hartmann, F. E., .  
1009 . . McDonald, B. A. (2017). Comparative transcriptome analyses in *Zymoseptoria*  
1010 *tritici* reveal significant differences in gene expression among strains during plant  
1011 infection. *Molecular Plant-Microbe Interactions*, 30(3), 231-244.  
1012 doi:10.1094/MPMI-07-16-0146-R  
1013
- 1014 Plissonneau, C., Hartmann, F. E., & Croll, D. (2018). Pangenome analyses of the wheat  
1015 pathogen *Zymoseptoria tritici* reveal the structural basis of a highly plastic  
1016 eukaryotic genome. *BMC Biology*, 16(1), 5. doi:10.1186/s12915-017-0457-4  
1017
- 1018 Ponomarenko, A., Goodwin, S. B., & Kema, G. H. J. (2011). Septoria Tritici Bloch (STB  
1019 of wheat. *Plant Health Instructor*. doi:10.1094/PHI-I-2011-0407-1001  
1020
- 1021 Prados Rosales, R. C., & Di Pietro, A. (2008). Vegetative hyphal fusion is not essential  
1022 for plant infection by *Fusarium oxysporum*. *Eukaryotic Cell*, 7(1), 162-171.  
1023 doi:10.1128/EC.00258-07  
1024
- 1025 Richards, A., Gow, N. A., & Veses, V. (2012). Identification of vacuole defects in fungi.  
1026 *Journal of Microbiological Methods*, 91(1), 155-163.  
1027 doi:10.1016/j.mimet.2012.08.002  
1028
- 1029 Robinson, M. D., McCarthy, D. J., & Smyth, G. K. (2010). edgeR: a Bioconductor  
1030 package for differential expression analysis of digital gene expression data.  
1031 *Bioinformatics*, 26(1), 139-140. doi:10.1093/bioinformatics/btp616  
1032
- 1033 Robinson, M. D., & Oshlack, A. (2010). A scaling normalization method for differential  
1034 expression analysis of RNA-seq data. *Genome Biology*, 11(3), R25.  
1035 doi:10.1186/gb-2010-11-3-r25  
1036
- 1037 Ruiz-Herrera, J., Leon, C. G., Guevara-Olvera, L., & Carabez-Trejo, A. (1995). Yeast-  
1038 mycelial dimorphism of haploid and diploid strains of *Ustilago maydis*.  
1039 *Microbiology*, 141, 695-703. doi:10.1099/13500872-141-3-695  
1040
- 1041 Schade, D., Walther, A., & Wendland, J. (2003). The development of a transformation  
1042 system for the dimorphic plant pathogen *Holleya sinicauda* based on *Ashbya*  
1043 *gossypii* DNA elements. *Fungal Genetics and Biology*, 40(1), 65-71.  
1044 doi:10.1016/s1087-1845(03)00064-1  
1045
- 1046 Shetty, N. P., Mehrabi, R., Lutken, H., Haldrup, A., Kema, G. H., Collinge, D. B., &  
1047 Jorgensen, H. J. (2007). Role of hydrogen peroxide during the interaction



- 1048 between the hemibiotrophic fungal pathogen *Septoria tritici* and wheat. *New*  
1049 *Phytologist*, 174(3), 637-647. doi:10.1111/j.1469-8137.2007.02026.x
- 1050
- 1051 Sitton, J. W., & Cook, R. J. (1981). Comparative morphology and survival of  
1052 chlamydospore of *Fusarium roseum* 'Culmorum' and 'Graminearum'. *Ecology and*  
1053 *Epidemiology*, 71(1), 85-90.
- 1054
- 1055 Son, H., Lee, J., & Lee, Y. W. (2012). Mannitol induces the conversion of conidia to  
1056 chlamydospore-like structures that confer enhanced tolerance to heat, drought,  
1057 and UV in *Gibberella zeae*. *Microbiological Research*, 167(10), 608-615.  
1058 doi:10.1016/j.micres.2012.04.001
- 1059
- 1060 Steinberg, G. (2015). Cell biology of *Zymoseptoria tritici*: Pathogen cell organization and  
1061 wheat infection. *Fungal Genetics and Biology*, 79, 17-23.  
1062 doi:10.1016/j.fgb.2015.04.002
- 1063
- 1064 Talbot, N. J., Ebbole, D. J., & Hamer, J. E. (1993). Identification and characterization of  
1065 MPGI, a gene involved in pathogenicity from the Rice Blast fungus *Magnaporthe*  
1066 *grisea*. *The Plant Cell*, 5, 1575-1590. doi:10.1105/tpc.5.11.1575
- 1067
- 1068 Thompson, D. S., Carlisle, P. L., & Kadosh, D. (2011). Coevolution of morphology and  
1069 virulence in *Candida* species. *Eukaryotic Cell*, 10(9), 1173-1182.  
1070 doi:10.1128/EC.05085-11
- 1071
- 1072 Torriani, S. F., Melichar, J. P., Mills, C., Pain, N., Sierotzki, H., & Courbot, M. (2015).  
1073 *Zymoseptoria tritici*: A major threat to wheat production, integrated approaches to  
1074 control. *Fungal Genetics and Biology*, 79, 8-12. doi:10.1016/j.fgb.2015.04.010
- 1075
- 1076 Trapnell, C., Pachter, L., & Salzberg, S. L. (2009). TopHat: discovering splice junctions  
1077 with RNA-Seq. *Bioinformatics*, 25(9), 1105-1111.  
1078 doi:10.1093/bioinformatics/btp120
- 1079
- 1080 Veses, V., & Gow, N. A. (2008). Vacuolar dynamics during the morphogenetic transition  
1081 in *Candida albicans*. *FEMS Yeast Research*, 8(8), 1339-1348.  
1082 doi:10.1111/j.1567-1364.2008.00447.x
- 1083
- 1084 Veses, V., & Gow, N. A. (2009). Pseudohypha budding patterns of *Candida albicans*.  
1085 *Medical Mycology*, 47(3), 268-275. doi:10.1080/13693780802245474
- 1086
- 1087 Vogel, H. J. (1956). A convenient growth medium for *Neurospora* (medium N). *Microbial*  
1088 *Genetics Bulletin*, 13, 42-43.
- 1089
- 1090 Wang, L., & Lin, X. (2012). Morphogenesis in fungal pathogenicity: shape, size, and  
1091 surface. *PLoS Pathogens*, 8(12), e1003027. doi:10.1371/journal.ppat.1003027
- 1092

- 1093 Wedge, M. E., Naruzawa, E. S., Nigg, M., & Bernier, L. (2016). Diversity in yeast-  
1094 mycelium dimorphism response of the Dutch Elm disease pathogens: the  
1095 inoculum size effect. *Canadian Journal of Microbiology*, 62(6), 525-529.  
1096 doi:10.1139/cjm-2015-0795  
1097  
1098 Wickham, H. (2009). *ggplot2: Elegant Graphics for Data Analysis*. (2nd Ed.). New York:  
1099 Use R. Springer-Verlag.  
1100  
1101 Yang, C., Li, W., Cao, J., Meng, F., Yu, Y., Huang, J., . . . Liu, J. (2017). Activation of  
1102 ethylene signaling pathways enhances disease resistance by regulating ROS and  
1103 phytoalexin production in rice. *The Plant Journal*, 89(2), 338-353.  
1104 doi:10.1111/tbj.13388  
1105  
1106 Yemelin, A., Brauchler, A., Jacob, S., Laufer, J., Heck, L., Foster, A. J., . . . Thines, E.  
1107 (2017). Identification of factors involved in dimorphism and pathogenicity of  
1108 *Zymoseptoria tritici*. *PLoS One*, 12(8), e0183065.  
1109 doi:10.1371/journal.pone.0183065  
1110  
1111 Zala, M., Mikaberidze, A., Alassimone, J. P. L., Muhammad, A., McDonald, B. A., &  
1112 Sánchez-Vallet, A. (2018). Co-infection alters virulence dynamics in the wheat  
1113 pathogen *Zymoseptoria tritici*. *in submission*.  
1114  
1115 Zhan, J., Linde, C. C., Jurgens, T., Merz, U., Steinebrunner, F., & McDonald, B. A.  
1116 (2005). Variation for neutral markers is correlated with variation for quantitative  
1117 traits in the plant pathogenic fungus *Mycosphaerella graminicola*. *Molecular*  
1118 *Ecology*, 14(9), 2683-2693. doi:10.1111/j.1365-294X.2005.02638.x

1119

1120

## 1121 **Data Accessibility**

1122 All raw sequencing data were deposited into the NCBI Short Read Archive under the  
1123 accession number SRP152081.

1124

## 1125 **Author contributions**

1126 C.S.F. and J.P.-G. conceived and designed experiments. C.S.F., MMZ and J.P.-G.  
1127 performed experiments. X.M. and C.S.F. were responsible for the bioinformatics  
1128 analysis. C.S.F., B.A.M. and J.P.-G. wrote the paper.

1129 **Figure Legends**

1130

1131 **Figure 1.** Effect of temperature on the cell morphology of four *Zymoseptoria tritici*  
1132 strains. (A) Blastospores incubated on nutrient-rich YSB medium at 18°C (the control  
1133 environment) multiply by budding as blastospores (white triangles). (B) The effect of  
1134 high temperatures on *Z. tritici* morphology was observed by exposing the strains to  
1135 27°C. At 8 hours after incubation (hai) at the high temperature, blastospores of the 1E4  
1136 strain were faster to respond to the new environment by switching to filamentous growth.  
1137 Black triangles point to hyphal branches. (C) At 24 hai, blastospores of the 3D1 and 3D7  
1138 strains began growing as hyphae. The 1A5 strain produced swollen cells (black arrows)  
1139 and pseudohyphae (asterisks), without any evidence of hyphal differentiation. (D) At 48  
1140 hai, hyphal branches were abundant for the 1E4, 3D1, and 3D7 strains. The 1A5 strain  
1141 continued to produce only swollen structures (black arrows). (E) At 96 hai, filamentous  
1142 growth was observed for the 1E4, 3D1, and 3D7 strains. For the 1A5 strain, high  
1143 temperature promoted the formation of two new morphotypes: pseudohyphae (asterisks)  
1144 and chlamyospore-like cells (black arrows). (F) After 144 hours of incubation, the  
1145 formation of chlamyospore-like cells was observed mainly at the tips of pseudohyphae  
1146 for the 1A5 strain and at the distal ends of mycelial filaments for the remaining strains  
1147 (1E4, 3D1, and 3D7) (black arrows). Bars represent 10 µm.

1148

1149 **Figure. 2.** Effect of carbon limitation on the cell morphology of four *Zymoseptoria tritici*  
1150 strains. A nutrient-rich medium (YSB) and a carbon-depleted medium (Minimal Media  
1151 without sucrose) were used to monitor the growth form transitions (A) Blastospores

1152 incubated on YSB continued to multiply as budding blastospores and were used as  
1153 controls. (B) Under carbon limitation stress, the blastospores of all tested strains began  
1154 growing as hyphae after 24 hours of incubation (arrows). (C) At 144 hai, a mycelial  
1155 growth was predominant, with frequent vegetative cell fusion events (asterisks) among  
1156 hyphae. Bars represent 20  $\mu\text{m}$ .

1157  
1158 **Figure. 3.** Transcriptome signatures of blastospore and mycelial growth phases  
1159 organized based on enrichment of molecular functional terms. (A) Common upregulated  
1160 genes during blastospore growth among the *Zymoseptoria tritici* strains. (B) Common  
1161 upregulated genes for mycelial growth among the *Z. tritici* strains.

1162  
1163 **Figure. 4.** Staining of cell wall chitin and lipid content in the different morphotypes of  
1164 *Zymoseptoria tritici*. Cell walls were stained with the chitin-binding dye Calcofluor White  
1165 (blue color) and the lipid droplets were stained with Nile Red (red color). Blastospores,  
1166 hyphae, and pseudohyphae showed a weaker fluorescence for Calcofluor White  
1167 compared to chlamydospores (A), including those formed terminally (B) or intercalarily  
1168 (C) via suspensor cells. A high accumulation of lipid droplets was observed in  
1169 chlamydospores, as well as in blastospores and pseudohyphae. Hyphae only showed a  
1170 high accumulation of lipid droplets in the hyphal branching zone. Bars represent 10  $\mu\text{m}$ .

1171  
1172 **Figure. 5.** Chlamydospore cells produced by *Zymoseptoria tritici* have thicker cell walls  
1173 than pycnidiospores and blastospores. Black triangles point to a detaching daughter cell

1174 budding from a blastospore mother cell. Images were obtained by transmission electron  
1175 microscopy. Two different magnifications are shown for each morphotype: up panels  
1176 scale bar = 2000 nm (low magnification), low panels scale bar = 500nm (high  
1177 magnification).

1178

1179 **Figure 6.** Chlamydospores produced by *Zymoseptoria tritici* are able to germinate both  
1180 *in vitro* and on the surface of wheat leaves. (A) Blastospores were used as a control.  
1181 Apical germination and hyphal elongation were observed after 12 hours of incubation on  
1182 water agar (WA) plates at 18°C. At 24 hpi, blastosporulation was observed from the  
1183 germinated blastospores. (B) Terminal chlamydospores formed via suspensor cells and  
1184 (C) free-chlamydospores initiated the germination after 12 h of incubation on water agar.  
1185 Hyphal elongation was obvious at 24 h. Bars represent 10 µm. (D) Free-  
1186 chlamydospores (upper image) and terminal chlamydospores (lower image) expressing  
1187 cytoplasmic GFP (green color) produced germ tubes on the surface of wheat leaves  
1188 after 24 hours of infection. Blue color corresponds to the autofluorescence detected from  
1189 chlorophyll A. Asterisks indicate the suspensor cells where chlamydospores are  
1190 attached. Bars represent 8 µm.

1191

1192 **Figure 7.** Chlamydospores produced by *Zymoseptoria tritici* are more tolerant to stress  
1193 than blastospores and pseudohyphae. Survival rate (%) was estimated based upon the  
1194 number of colonies formed after exposure to the stressful environment compared to the  
1195 number of colonies formed in the control environment after seven days. (A)

1196 Blastospores, pseudohyphae and chlamyospore cells were kept for 1, 3, 5, and 10  
1197 days in a sealed box containing anhydrous silica gel to produce a dry environment. This  
1198 simulated drought stress affected blastospore and pseudohyphae survival over time.  
1199 Chlamyospores were less affected and exhibited a survival rate of 50% after 10 days  
1200 under drought stress. (B) The same three morphotypes were subjected to a cold shock.  
1201 Blastospores, pseudohyphae, and chlamyospores were submerged in liquid nitrogen  
1202 for 1, 2, and 3 minutes at -196 °C. Only chlamyospores survived this cold stress. (C)  
1203 The same three morphotypes were subjected to heat stress based on incubation for 24  
1204 hours at 30°C, 35°C or 40°C. Blastospores and chlamyospores were equally affected  
1205 at 30°C. The incubation at 35°C killed all the blastospores, while chlamyospore  
1206 survived at a 12% rate, double the rate observed for pseudohyphae (6%). No colonies  
1207 were observed after incubation at 40°C. One star indicates that the adjusted p value is  
1208 under 0.05, two stars indicates that the p value is under 0.005, and three stars indicates  
1209 that the p value is under 0.0005. NS indicates no significant difference.

1210  
1211 **Figure 8.** Germinated pycnidiospores of *Zymoseptoria tritici* produce new blastospores  
1212 via blastosporulation on the surface of wheat leaves. (A) At 24 hours after infection,  
1213 pycnidiospores (asterisk) germinated and formed hyphal branches expressing GFP  
1214 (green color). The germinated pycnidiospores produced new blastospores on the host  
1215 leaves (arrow). (B) We observed a significant increase of budding points on germinated  
1216 pycnidiospores (arrows), as well as more free blastospores on the leaf surface at 48  
1217 hours after infection. At this time point, we also observed several vegetative cell fusion

1218 events between blastospores and pycnidiospores, which are characterized by a tubular  
1219 shaped bridge between the fusing cells (asterisks). Blue color corresponds to  
1220 autofluorescence detected from Chlorophyll A. Bars represent 10  $\mu\text{m}$ .



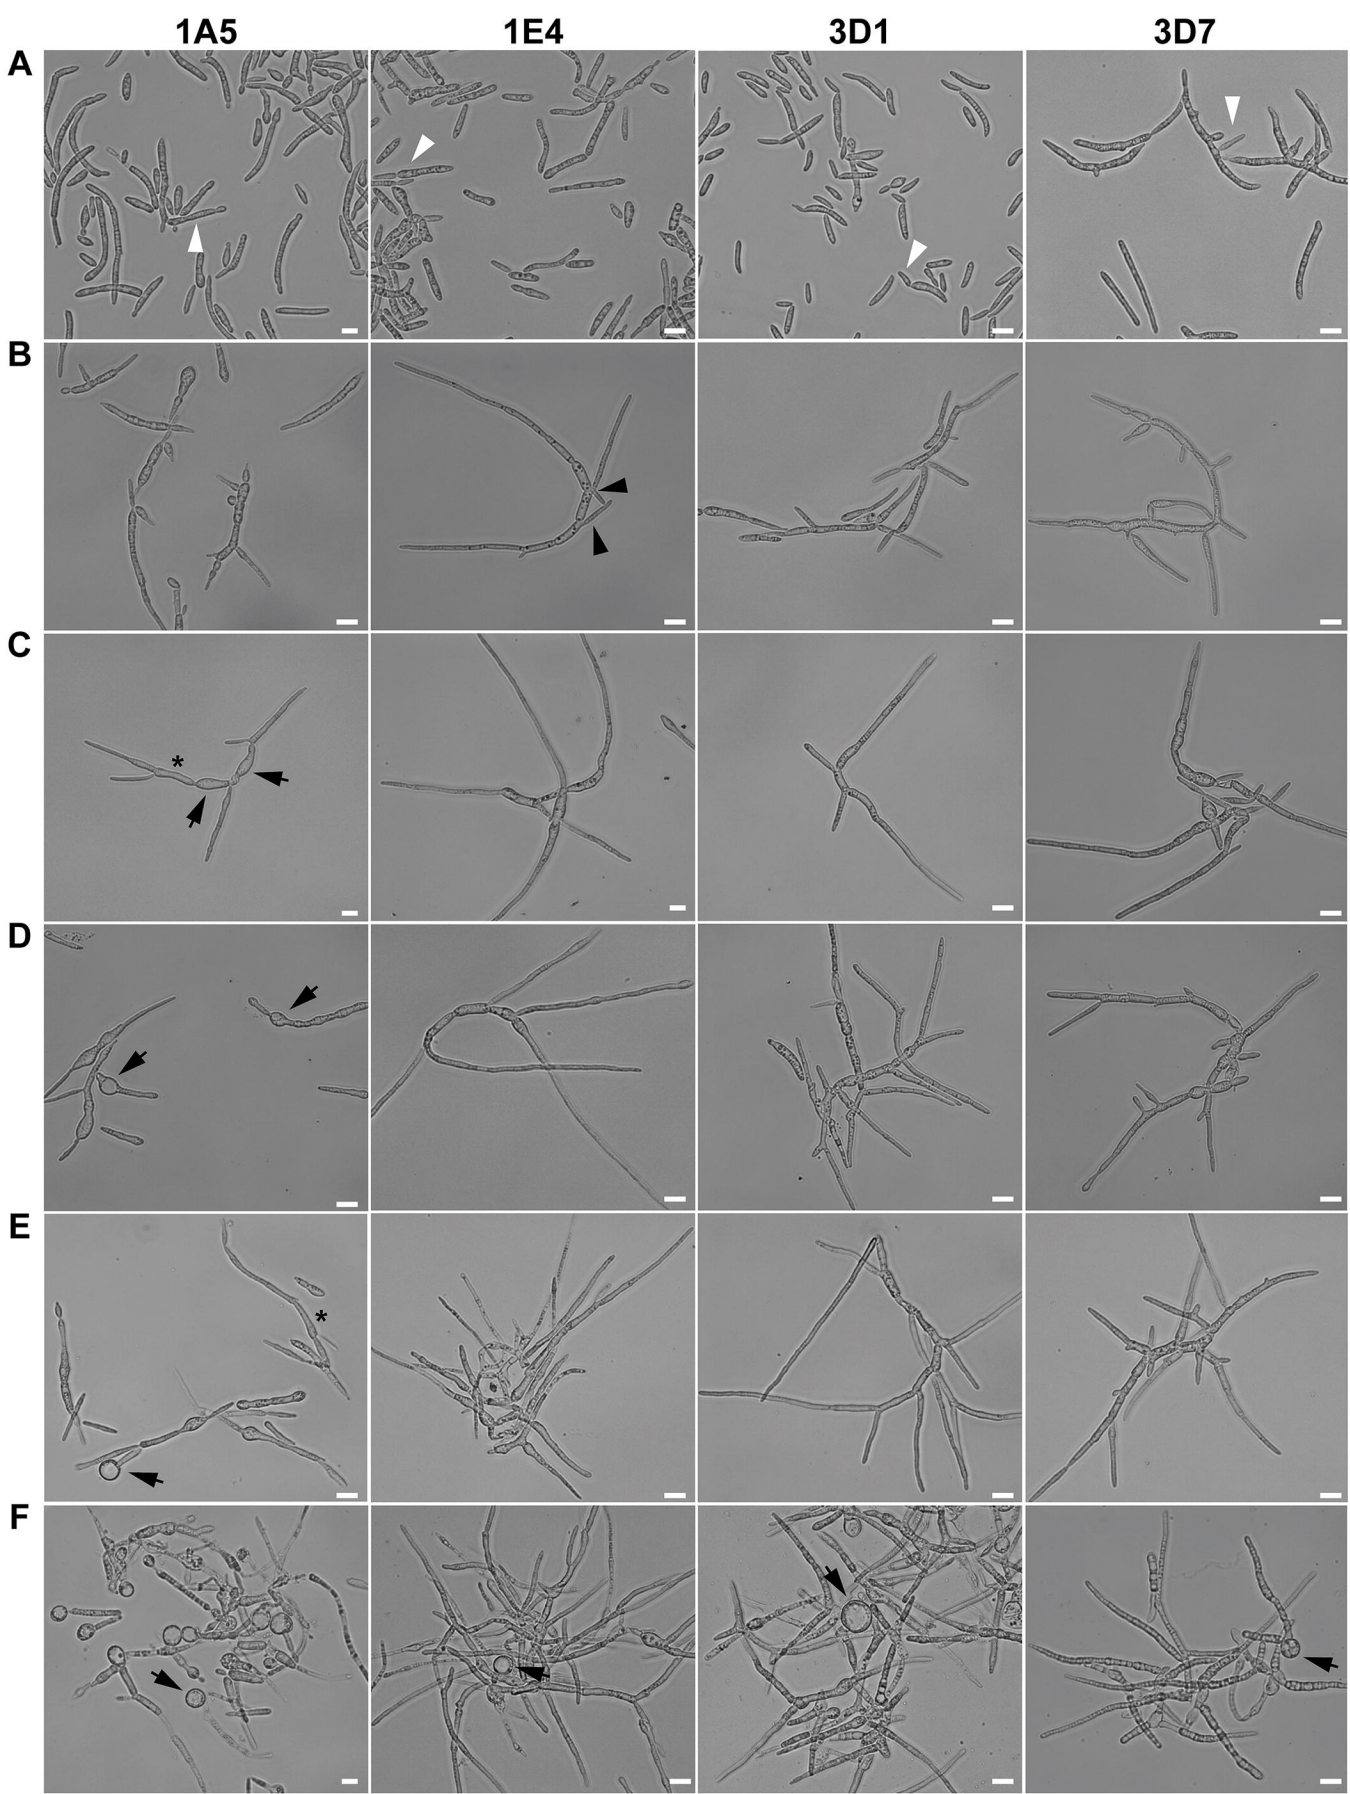

**1A5****1E4****3D1****3D7****A**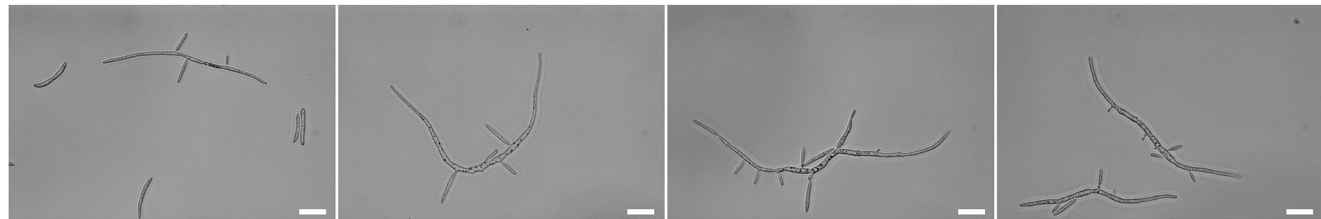**B**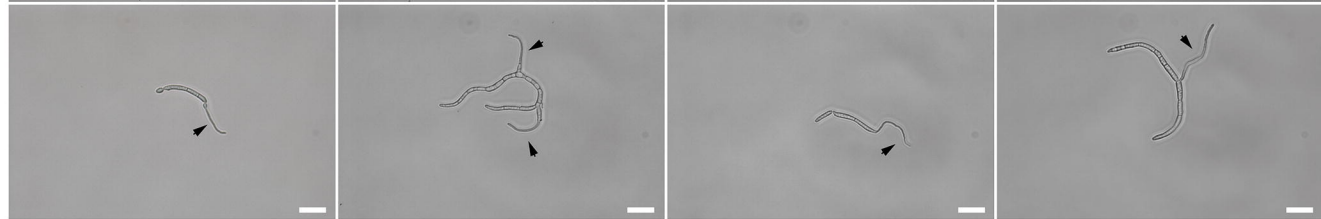**C**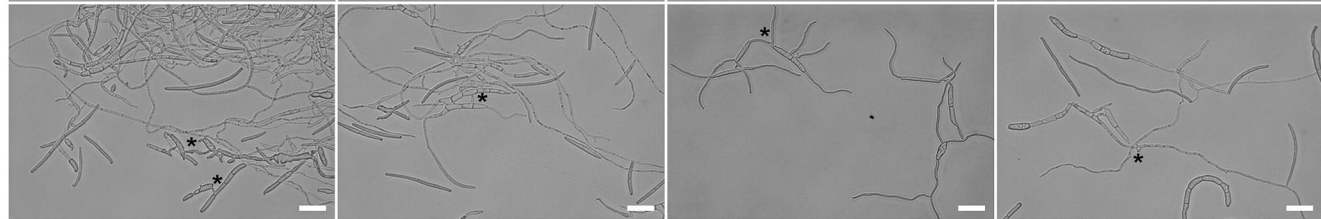

## A Upregulated genes during blastospore growth

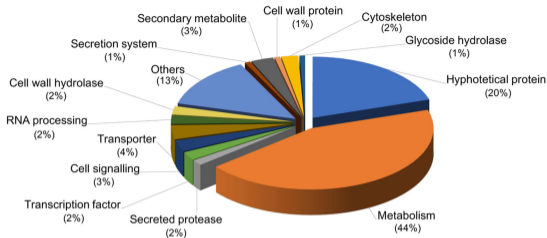

## B Upregulated genes during hyphal growth

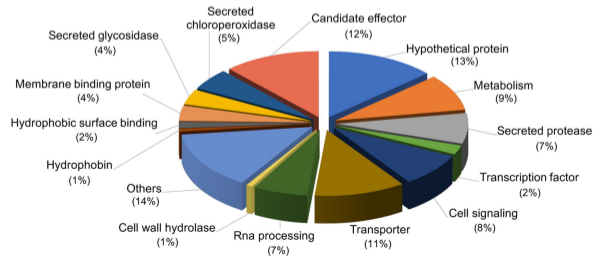

**Blastospore**

**Hyphae**

**Pseudohyphae**

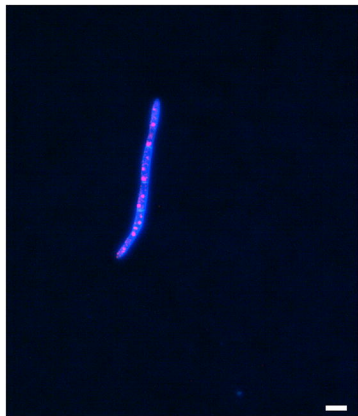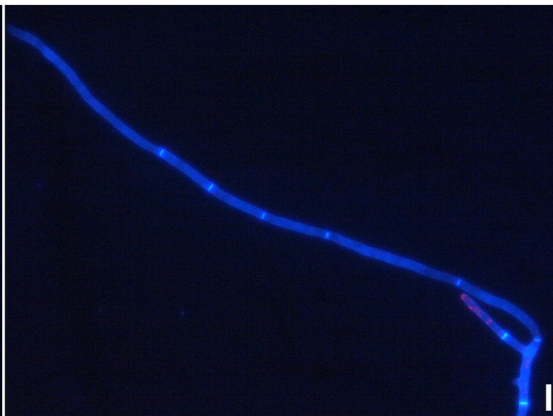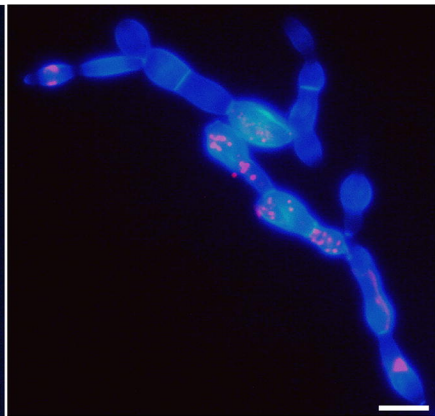

**Chlamydospores**

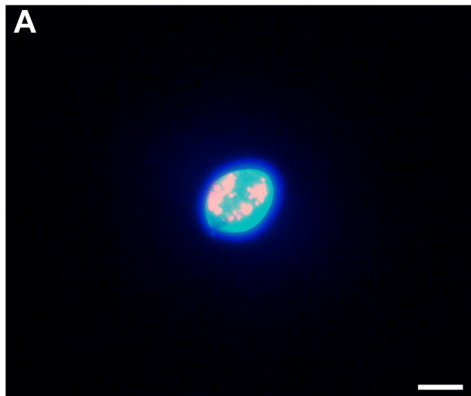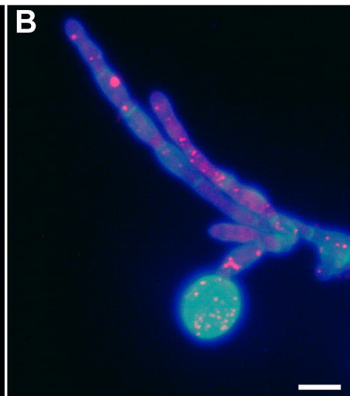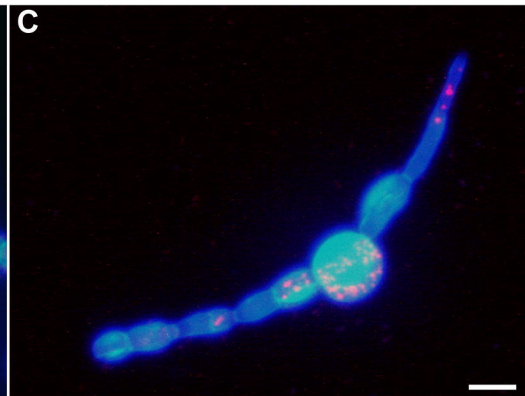

**Pycnidiospore**

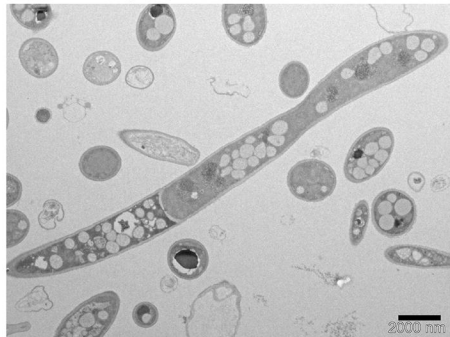

**Blastospore**

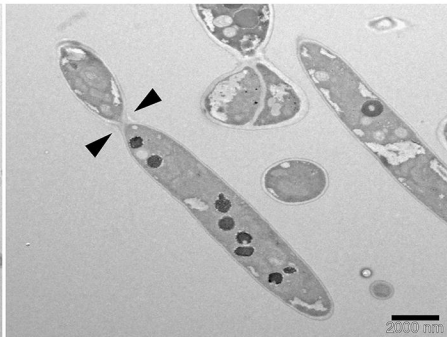

**Chlamydospore**

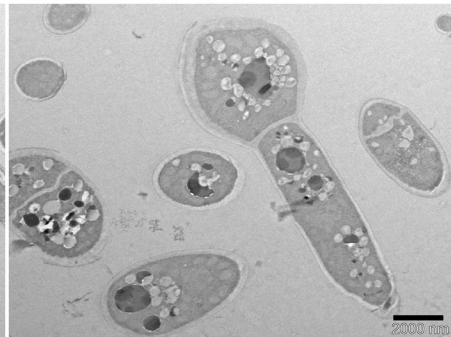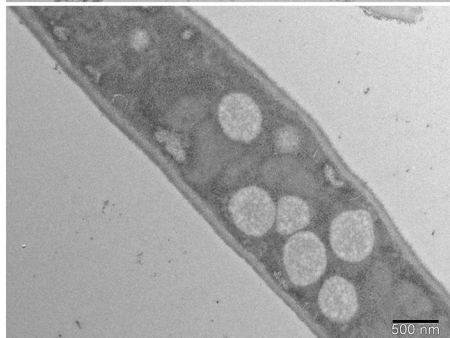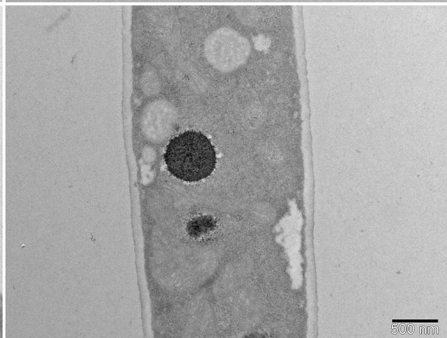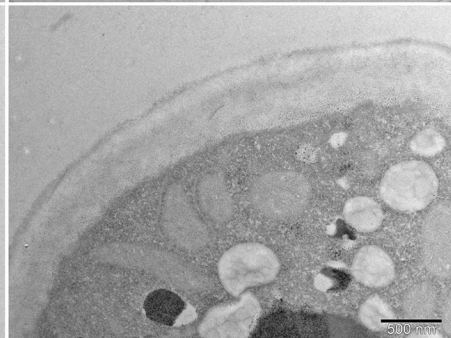

***In vitro***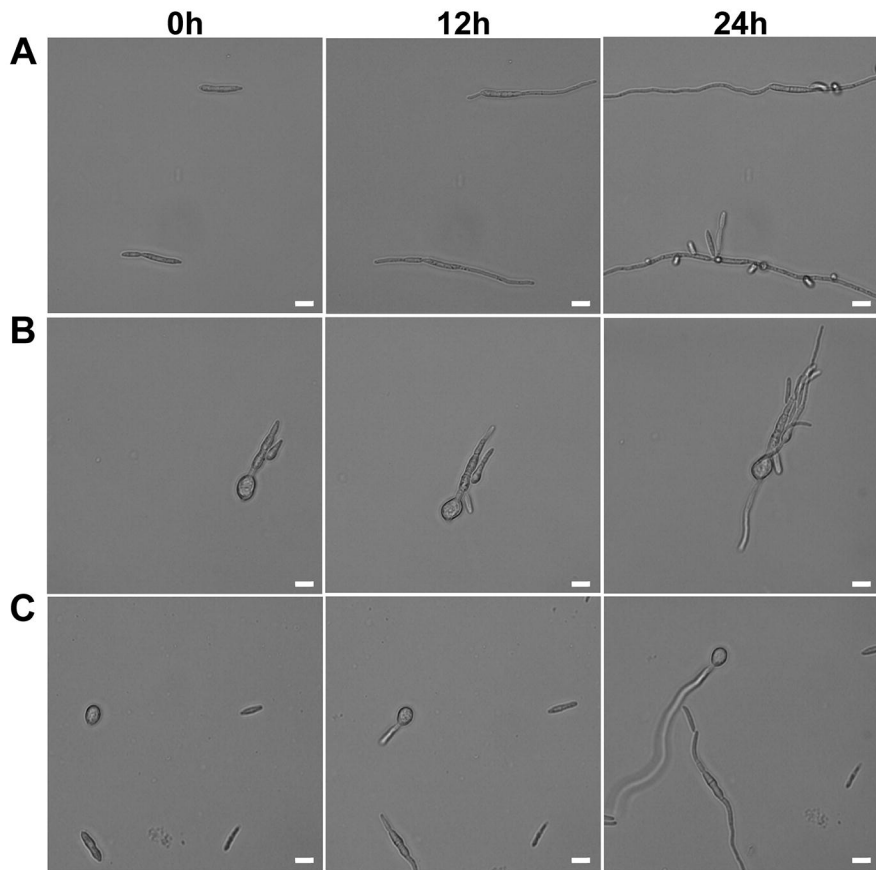***In planta***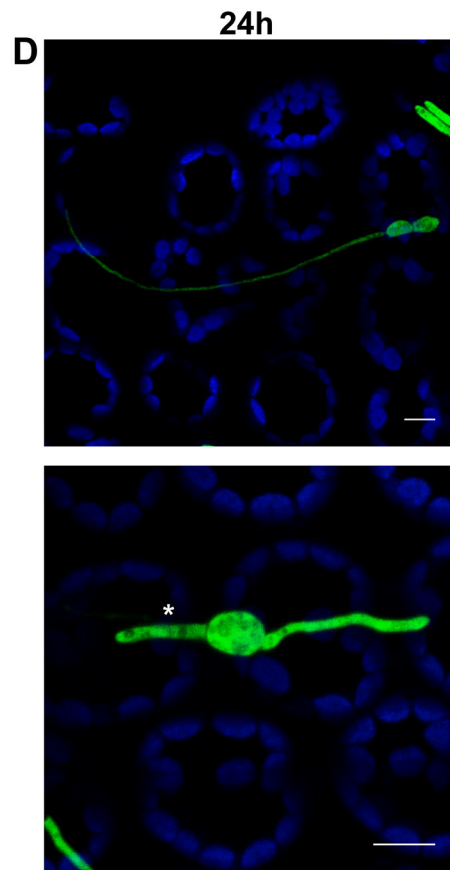

**A****Drought**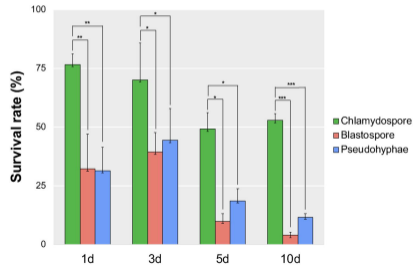**B****Cold stress**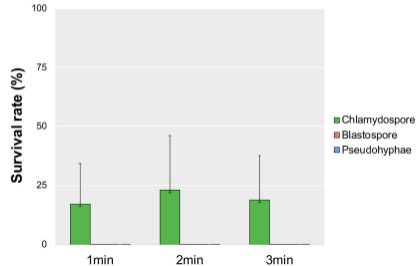**C****Heat stress**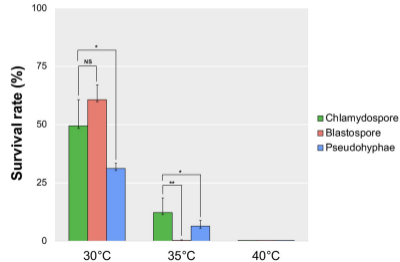

**A**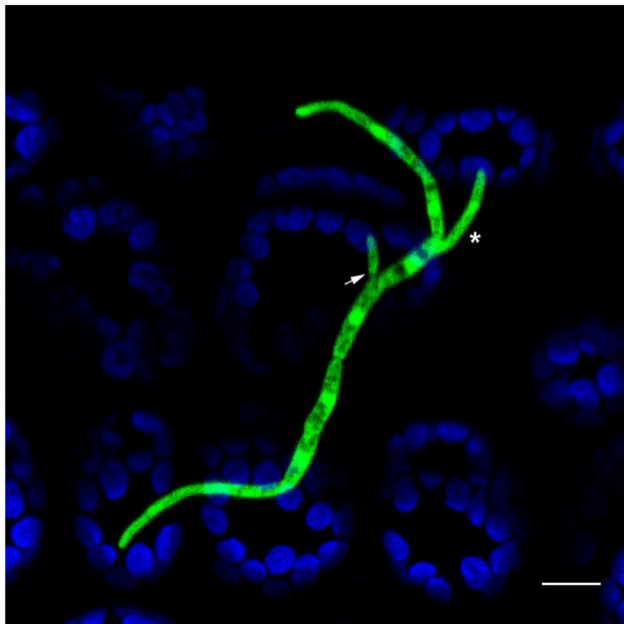**B**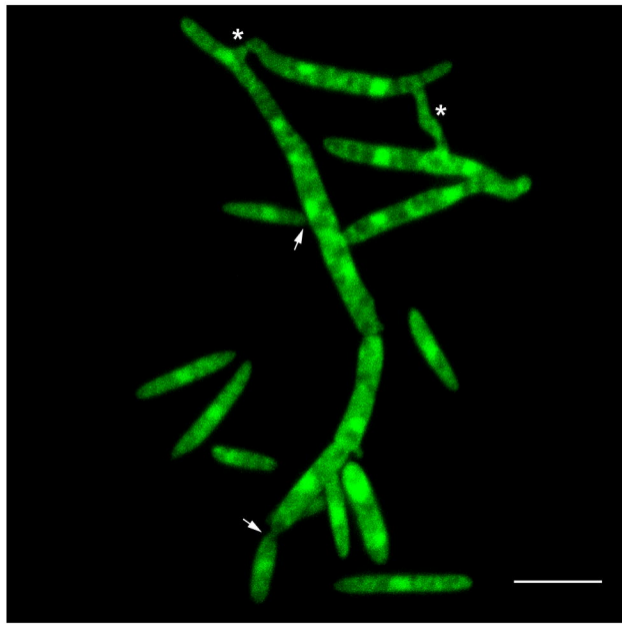

Source: http://biorxiv.org/content/10.1101/372078v1.full.pdf
